# Supplementary material for: Rhabdastrellosides A and B: Two New Isomalabaricane Glycosides from the Marine Sponge Rhabdastrella globostellata, and Their Cytotoxic and Cytoprotective Effects
Source: MDPI journal article supplement (doi:10.3390/md21110554), 2023-10-25
Supplement: s1 [file s1]

## Supplementary Materials

# Rhabdastrellosides A and B, isomalabaricane glycosides from the marine sponge *Rhabdastrella globostellata*, and their cytotoxic and cytoprotective effects

Anastasia B. Kozhushnaya <sup>1,⊥</sup>, Sophia A. Kolesnikova <sup>1,⊥,\*</sup>, Ekaterina A. Yurchenko <sup>1</sup>, Ekaterina G. Lyakhova <sup>1</sup>, Alexander S. Menshov <sup>1</sup>, Anatoly I. Kalinovsky <sup>1</sup>, Roman S. Popov <sup>1</sup>, Pavel S. Dmitrenok <sup>1</sup> and Natalia V. Ivanchina <sup>1</sup>

<sup>1</sup> G.B. Elyakov Pacific Institute of Bioorganic Chemistry, Far Eastern Branch of Russian Academy of Sciences, Pr. 100-let Vladivostoku 159, 690022 Vladivostok, Russia; kozhushnaia.ab@mail.ru (A.B.K.); eyurch@piboc.dvo.ru (E.A.Y.); elyakhova@inbox.ru (E.G.L.); menshov90@piboc.dvo.ru (A.S.M.); kaaniw@piboc.dvo.ru (A.I.K.); prs\_90@mail.ru (R.S.P.); paveldmt@piboc.dvo.ru (P.S.D.); ivanchina@piboc.dvo.ru (N.V.I.) <sup>⊥</sup> A.B.K. and S.A.K. contributed equally.

\* Correspondence: sovin81@inbox.ru (S.A.K.); Tel.: +7-423-231-1168

## Contents:

- S1** (–)HRESIMS of Rhabdastrelloside A (**1**) and MS/MS spectrum of its  $[M - H]^-$  precursor ion at  $m/z$  838
- S2** HRESIMS (Positive Ion Mode) of Rhabdastrelloside A (**1**)
- S3**  $^1\text{H}$  NMR Spectrum of Rhabdastrelloside A (**1**) in  $\text{CD}_3\text{OD}$  (700 MHz)
- S4**  $^{13}\text{C}$  NMR Spectrum of Rhabdastrelloside A (**1**) in  $\text{CD}_3\text{OD}$  (700 MHz)
- S5** HSQC Spectrum of Rhabdastrelloside A (**1**) in  $\text{CD}_3\text{OD}$  (700 MHz)
- S6** HMBC Spectrum of Rhabdastrelloside A (**1**) in  $\text{CD}_3\text{OD}$  (700 MHz)
- S7** COSY Spectrum of Rhabdastrelloside A (**1**) in  $\text{CD}_3\text{OD}$  (700 MHz)
- S8** Expanded COSY Spectrum of Rhabdastrelloside A (**1**) in  $\text{CD}_3\text{OD}$  (700 MHz)
- S9** 2D TOCSY Spectrum of Rhabdastrelloside A (**1**) in  $\text{CD}_3\text{OD}$  (700 MHz)
- S10** Expanded 2D TOCSY Spectrum for disaccharide moiety in Rhabdastrelloside A (**1**) in  $\text{CD}_3\text{OD}$  (700 MHz)
- S11** ROESY Spectrum of Rhabdastrelloside A (**1**) in  $\text{CD}_3\text{OD}$  (700 MHz)
- S12** UV and ECD Spectra of Rhabdastrelloside A (**1**) in EtOH
- S13** (–)HRESIMS of Rhabdastrelloside B (**2**) and MS/MS spectrum of its  $[M - H]^-$  precursor ion at  $m/z$  822
- S14** HRESIMS (Positive Ion Mode) of Rhabdastrelloside B (**2**)
- S15**  $^1\text{H}$  NMR Spectrum of Rhabdastrelloside B (**2**) in  $\text{CD}_3\text{OD}$  (500 MHz)
- S16**  $^{13}\text{C}$  NMR Spectrum of Rhabdastrelloside B (**2**) in  $\text{CD}_3\text{OD}$  (500 MHz)
- S17** HSQC Spectrum of Rhabdastrelloside B (**2**) in  $\text{CD}_3\text{OD}$  (500 MHz)
- S18** HMBC Spectrum of Rhabdastrelloside B (**2**) in  $\text{CD}_3\text{OD}$  (700 MHz)
- S19** COSY Spectrum of Rhabdastrelloside B (**2**) in  $\text{CD}_3\text{OD}$  (500 MHz)
- S20** ROESY Spectrum of Rhabdastrelloside B (**2**) in  $\text{CD}_3\text{OD}$  (500 MHz)
- S21** 1D TOCSY Spectra of Rhabdastrelloside B (**2**) in  $\text{CD}_3\text{OD}$  (500 MHz)
- S22** UV and ECD Spectra of Rhabdastrelloside B (**2**) in EtOH
- S23** Determination of Absolute Configurations of Monosaccharides: GC-MS profiles.
- S24** Determination of Absolute Configurations of Monosaccharides: GC-MS profiles for sum of Standard L-Glc and D-Glc, and Standard L-2-NHAcGlc.
- S25** Determination of Absolute Configurations of Monosaccharides: EIMS spectra of detected D-Glc and Standard D-Glc.
- S26** Determination of Absolute Configurations of Monosaccharides: EIMS spectra of detected D-Glc and Standard D-Glc (Continuation).
- S27** Determination of Absolute Configurations of Monosaccharides: EIMS spectra of detected D-2-NHAcGlc and Standard D-2-NHAcGlc.
- S28** The Isolation Scheme

**S1** (–)HRESIMS of Rhabdastrelloside A (**1**) and MS/MS spectrum of its  $[M - H]^-$  precursor ion at  $m/z$  838

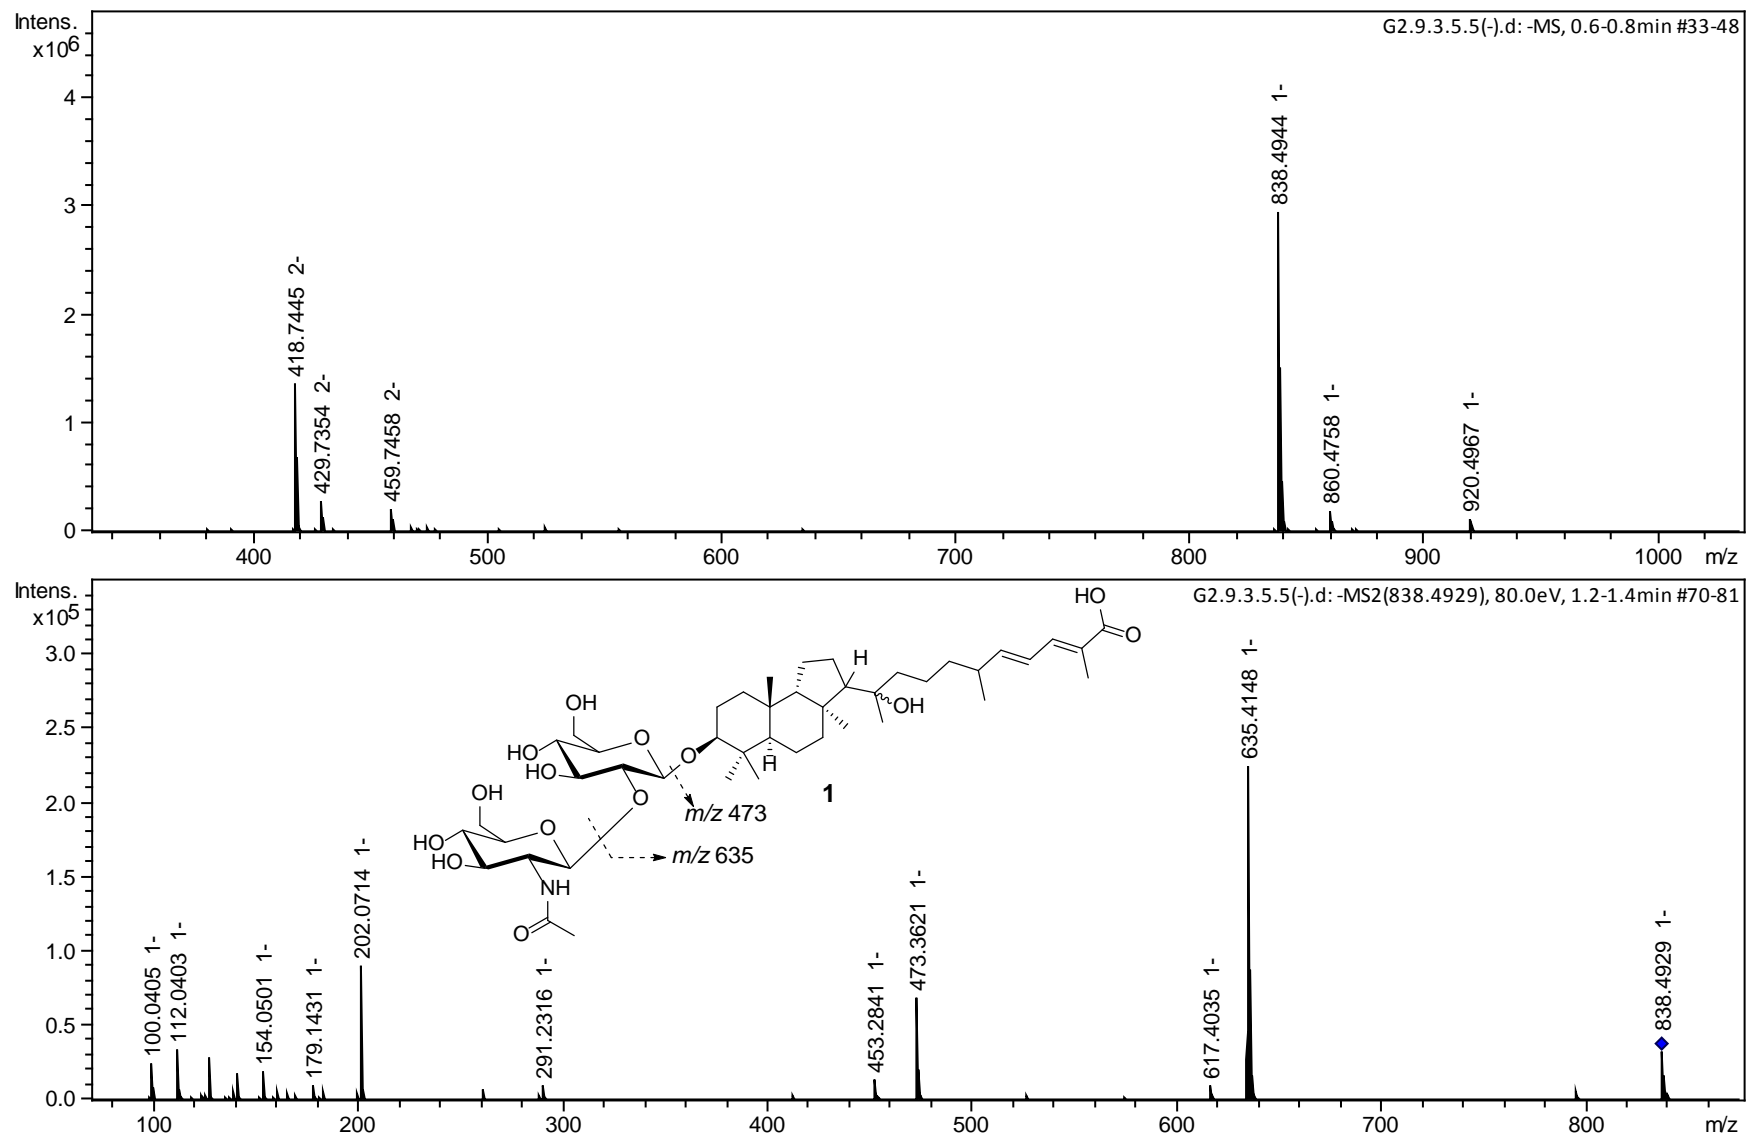

## S2 HRESIMS (Positive Ion Mode) of Rhabdastrelloside A (1)

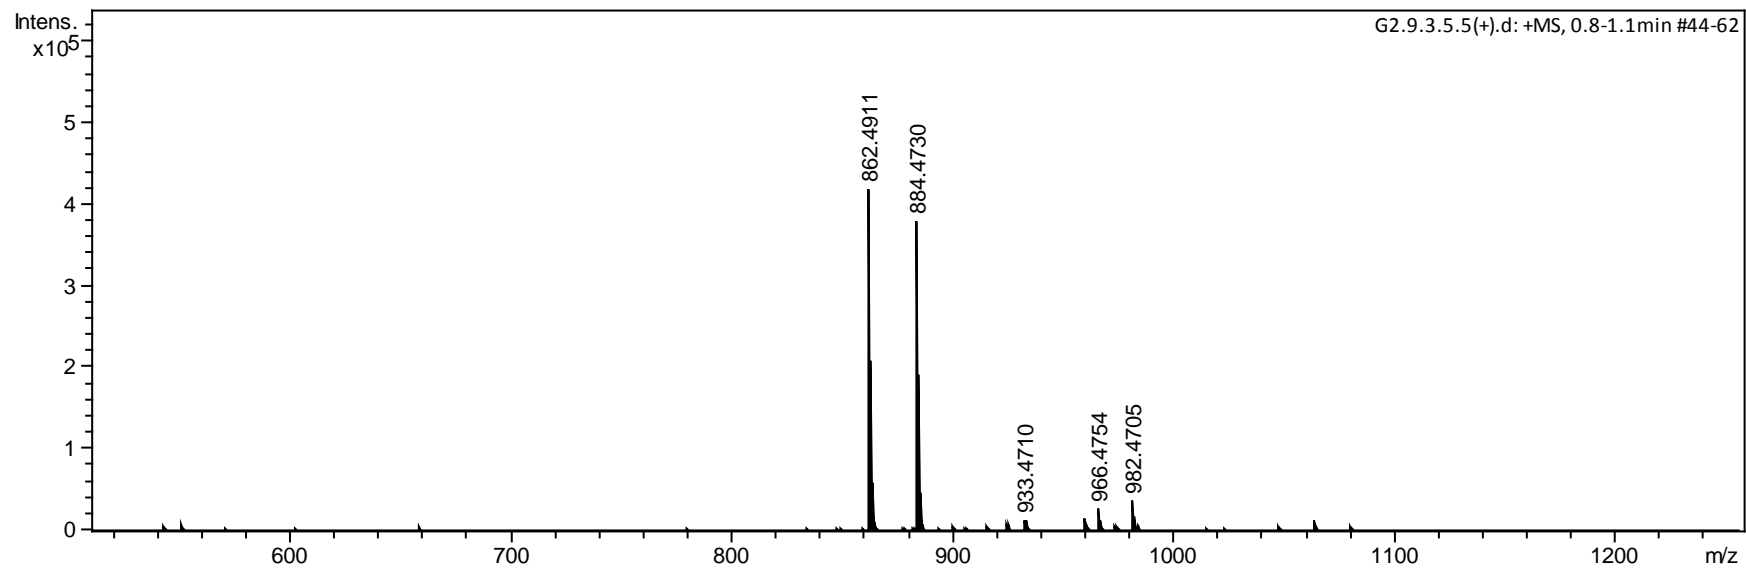

**S3**  $^1\text{H}$  NMR Spectrum of Rhabdastrelloside A (**1**) in  $\text{CD}_3\text{OD}$  (700 MHz)

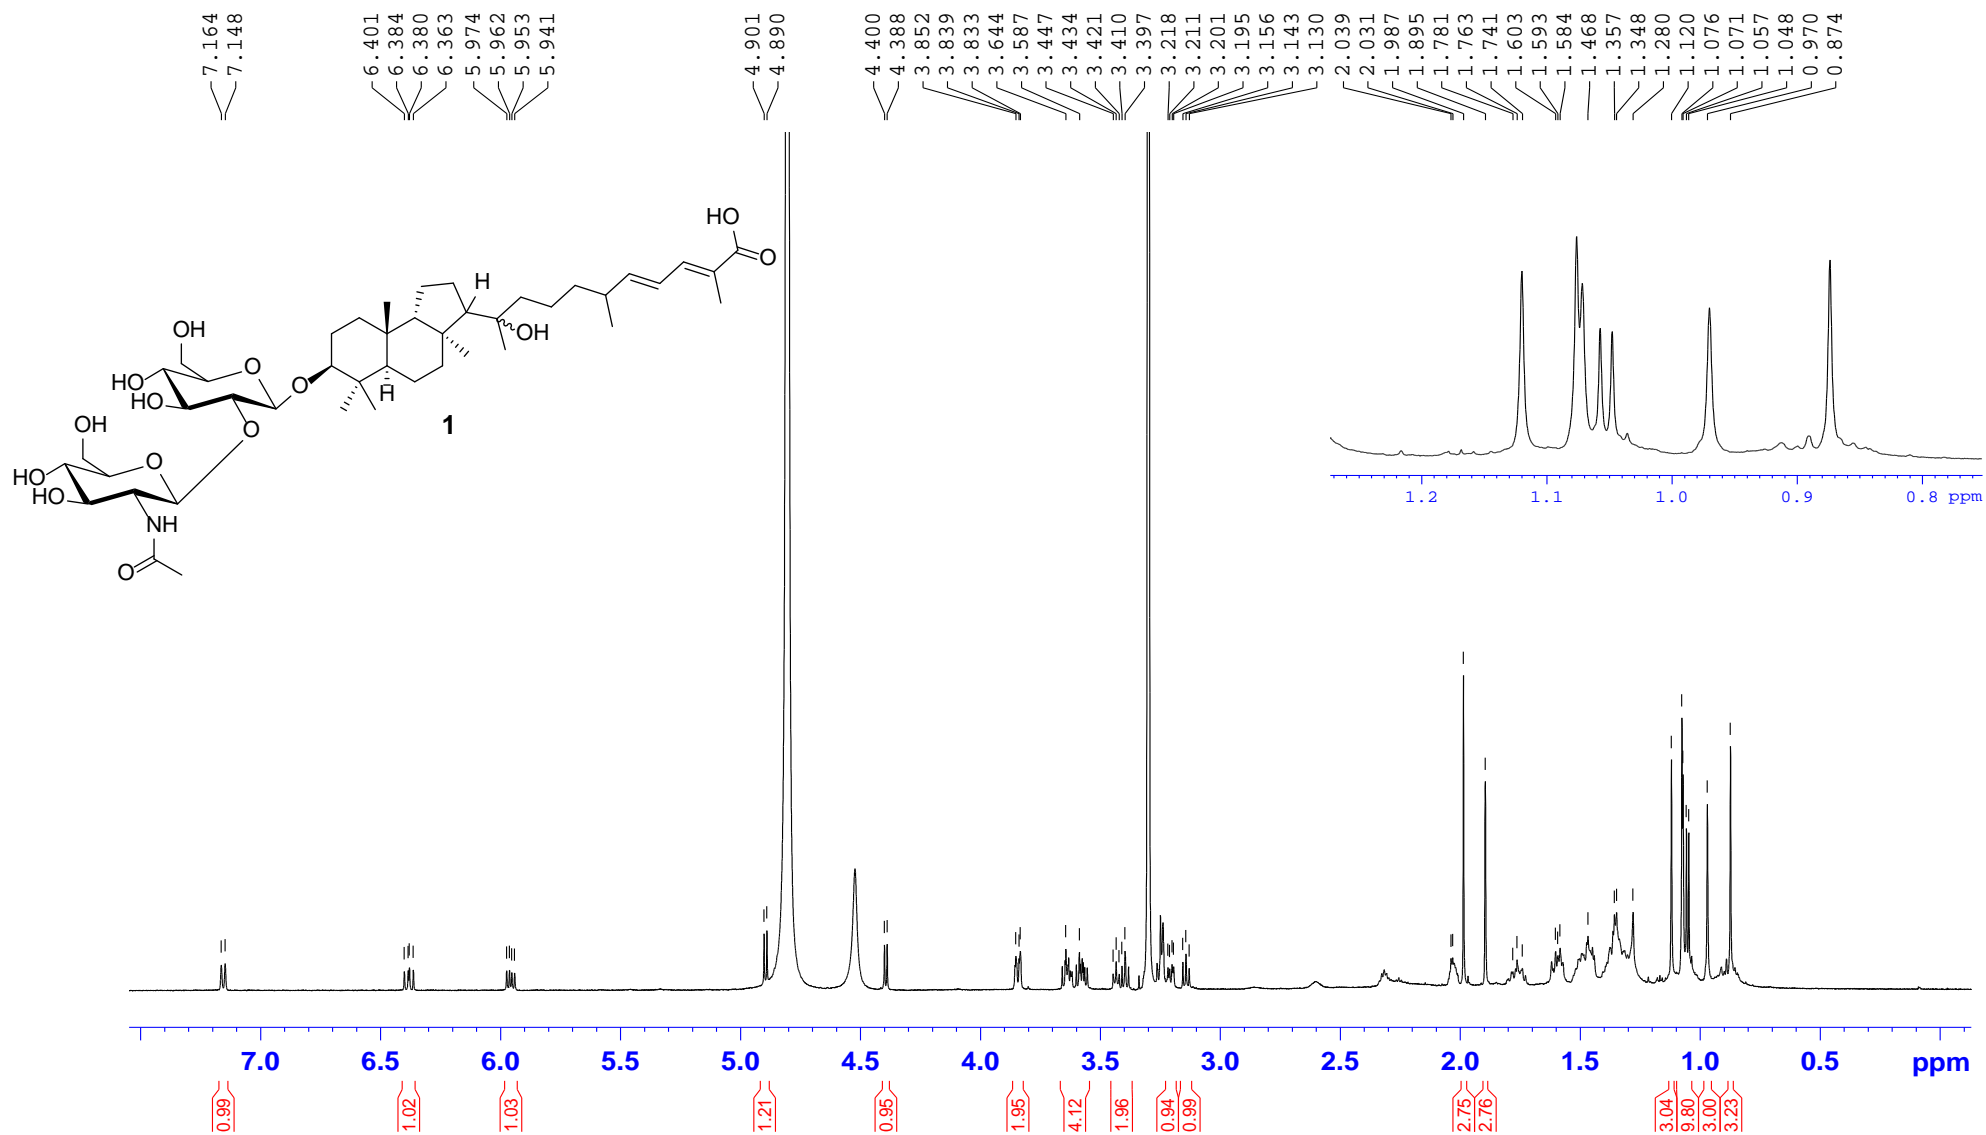

**S4**  $^{13}\text{C}$  NMR Spectrum of Rhabdastrelloside A (**1**) in  $\text{CD}_3\text{OD}$  (700 MHz)

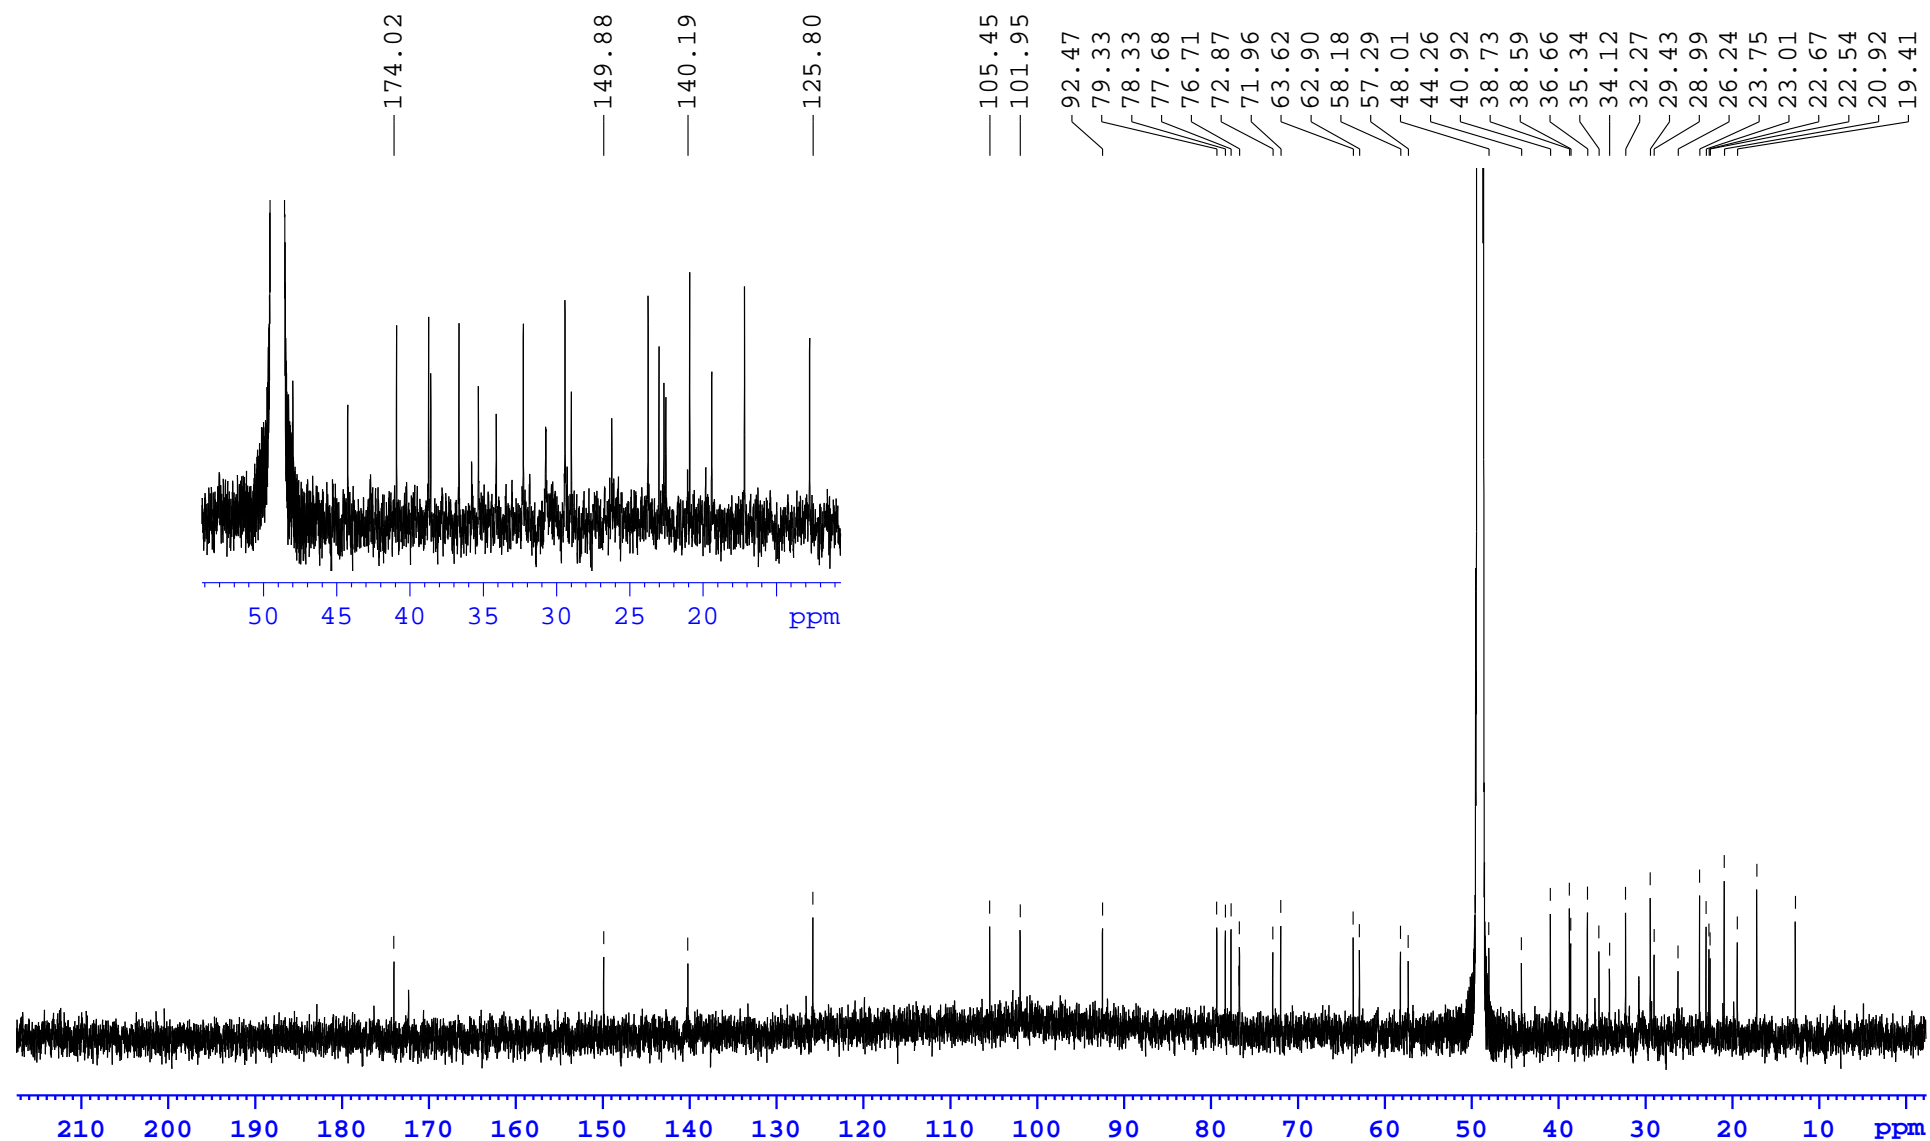

**S5** HSQC Spectrum of Rhabdastrelloside A (**1**) in CD<sub>3</sub>OD (700 MHz)

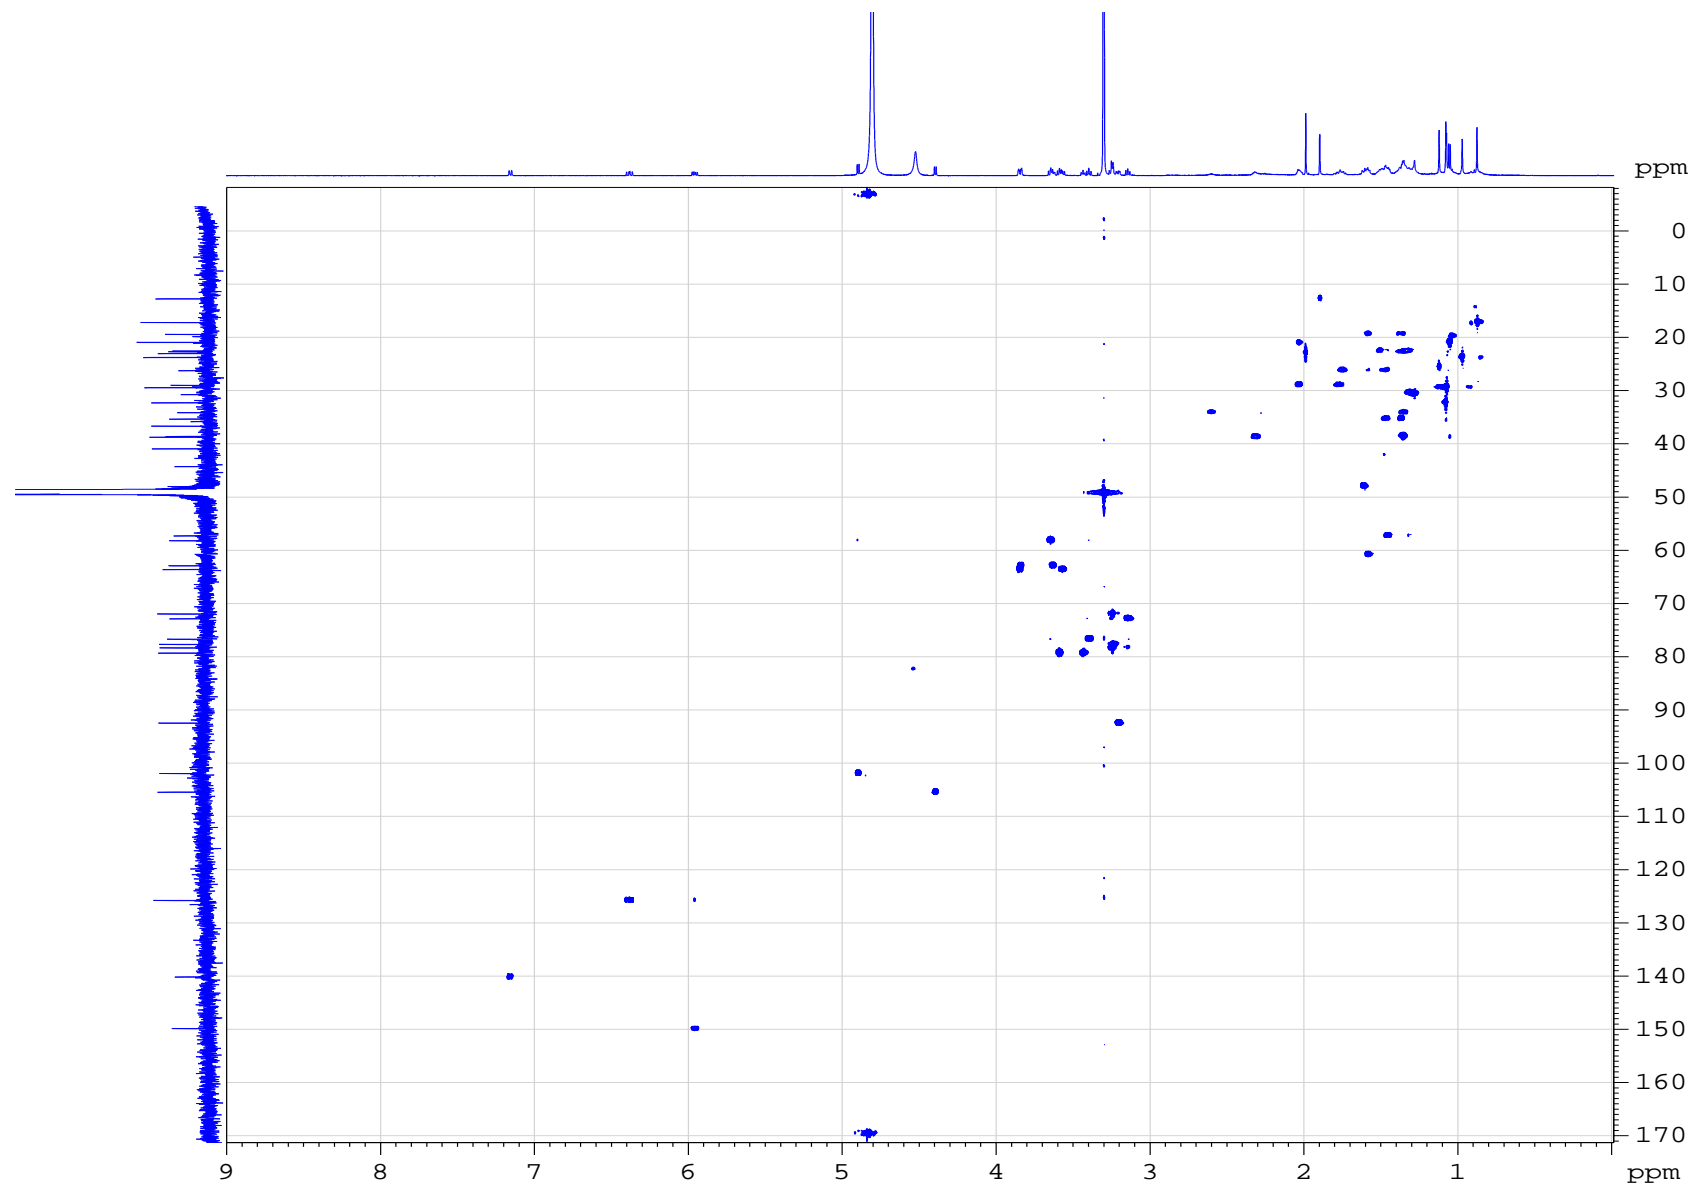

**S6** HMBC Spectrum of Rhabdastrelloside A (**1**) in CD<sub>3</sub>OD (700 MHz)

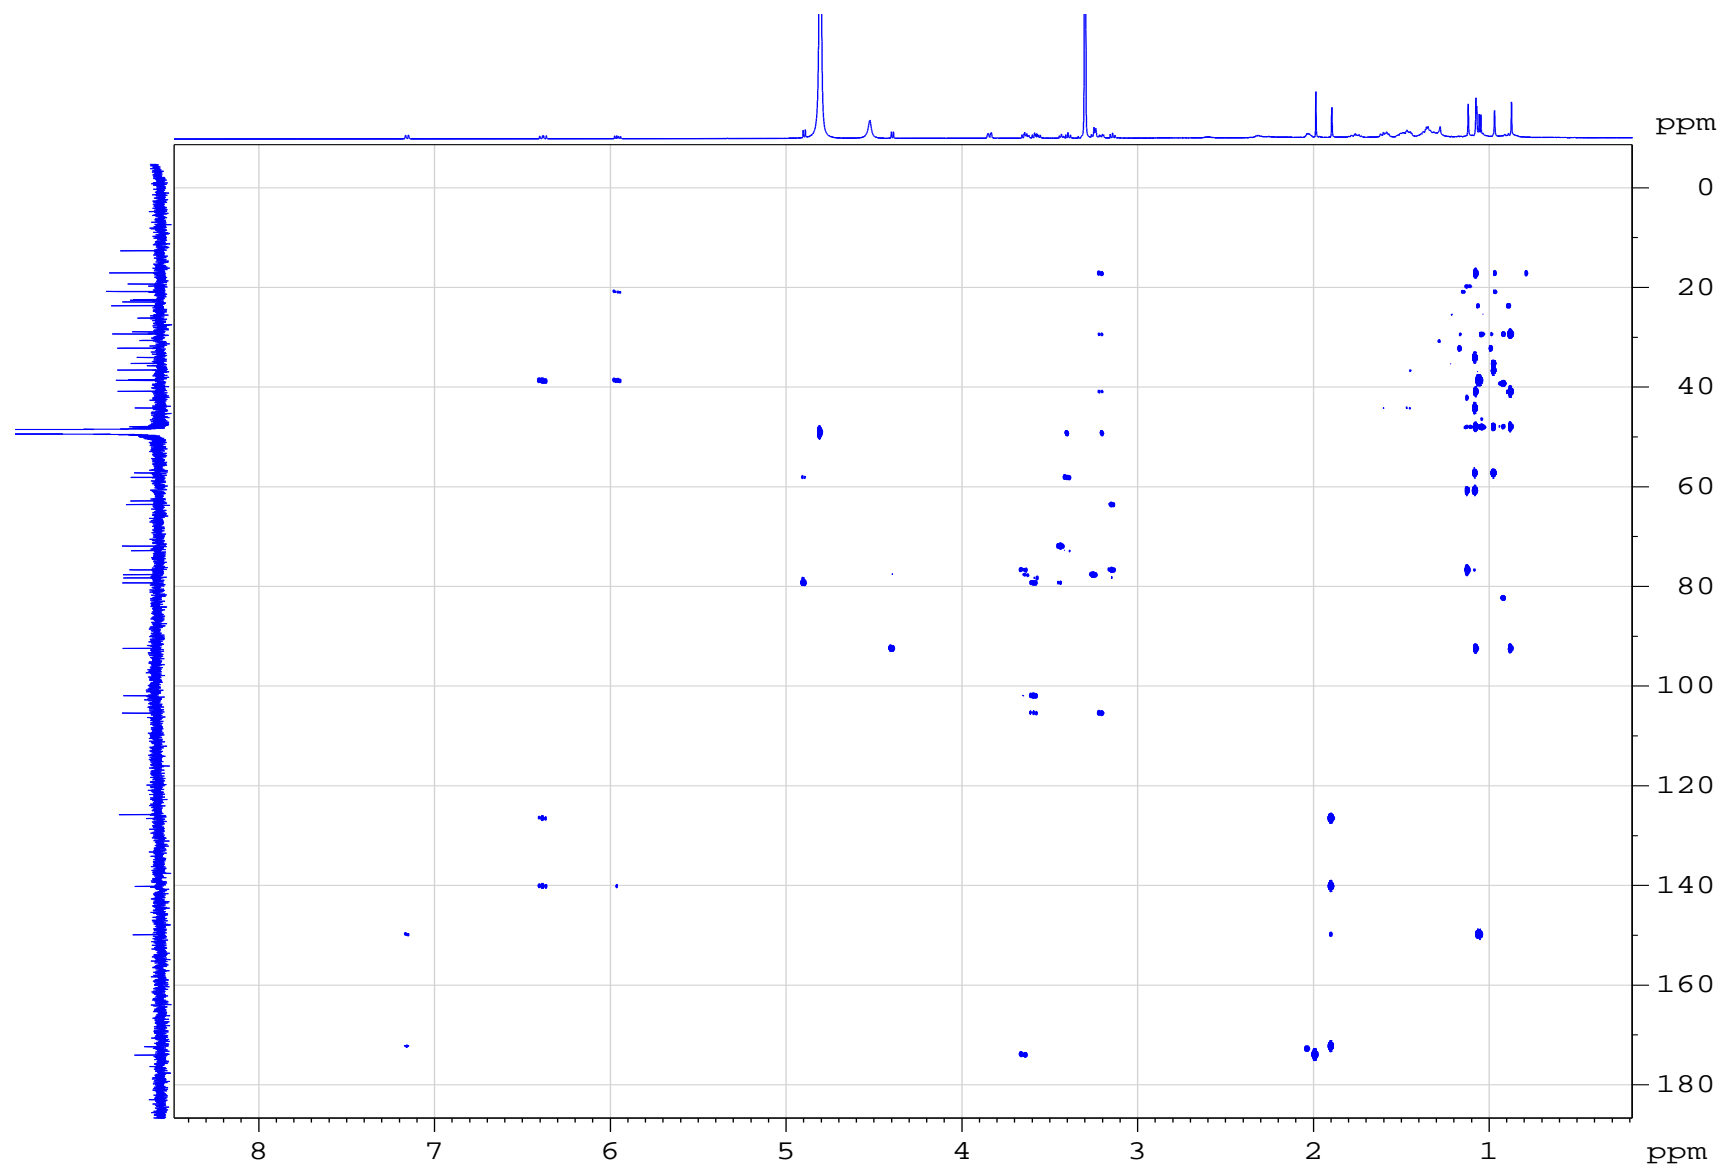



**S7** COSY Spectrum of Rhabdastrelloside A (**1**) in CD<sub>3</sub>OD (700 MHz)

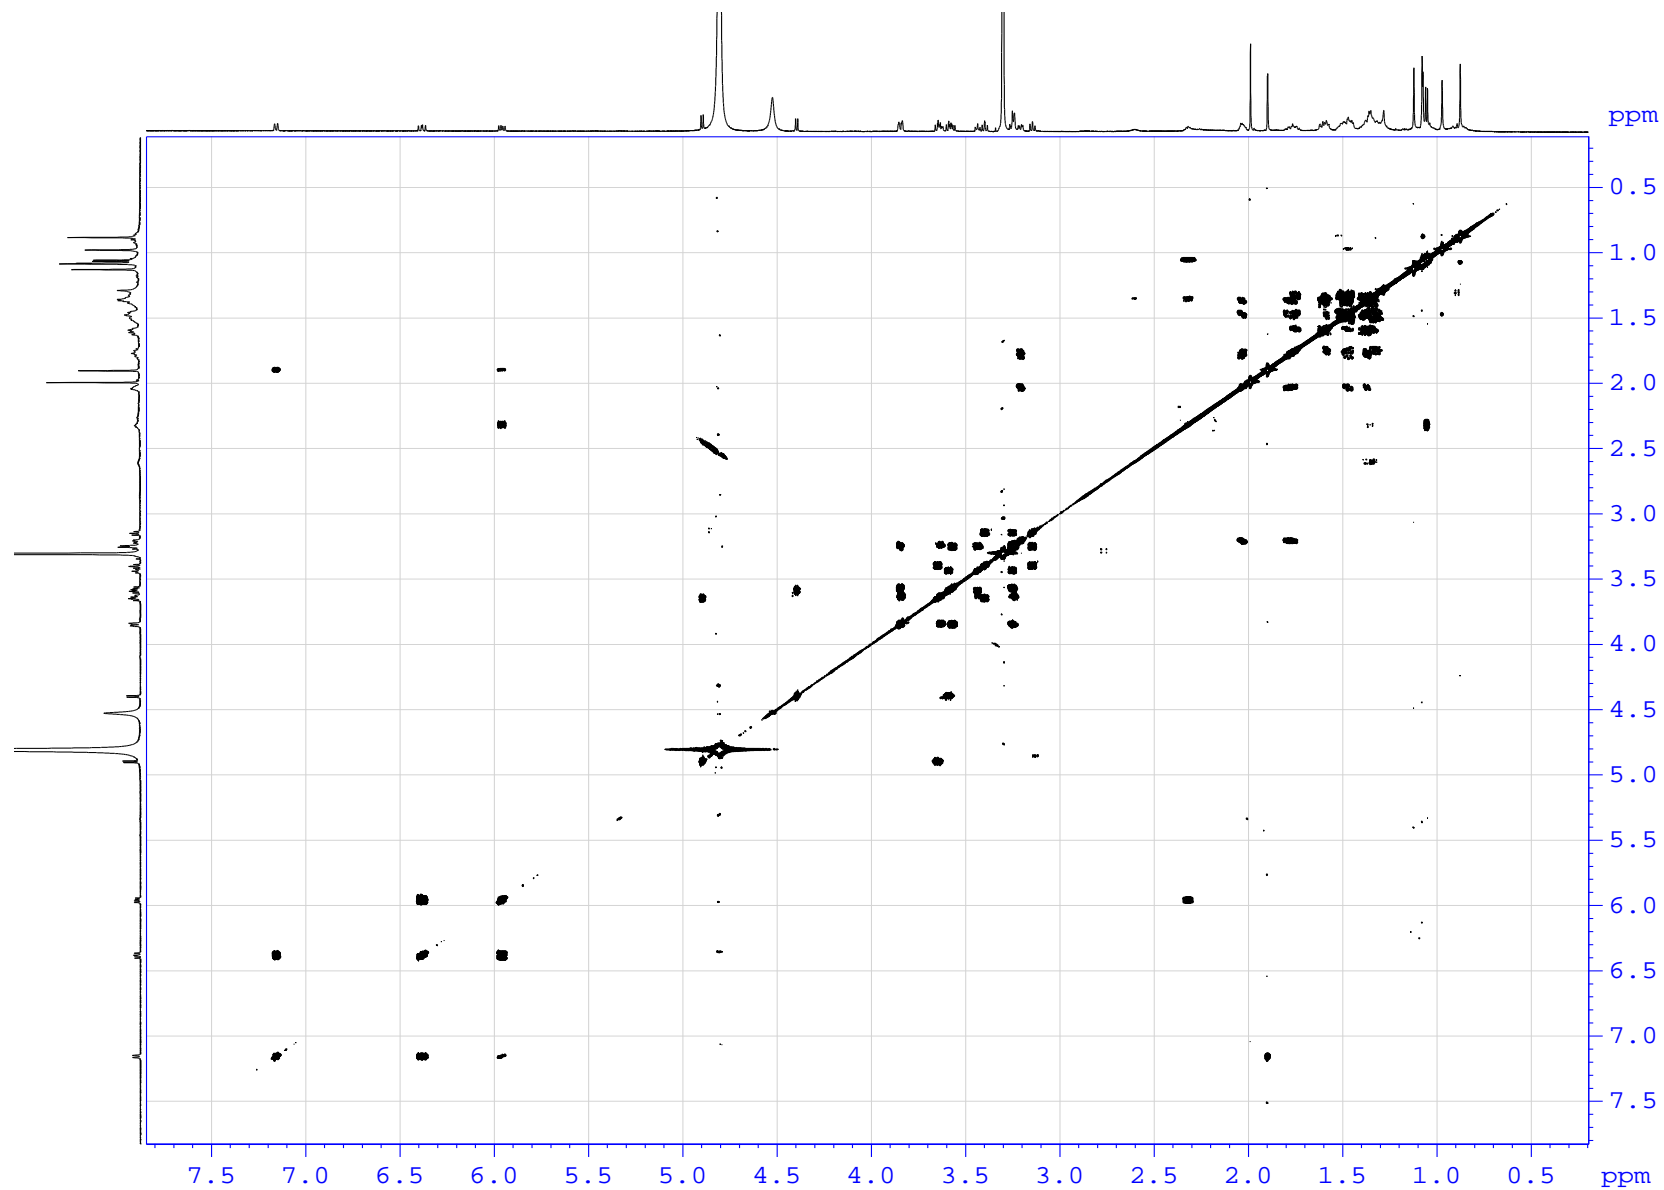

**S8** Expanded COSY Spectrum of Rhabdastrelloside A (**1**) in CD<sub>3</sub>OD (700 MHz)

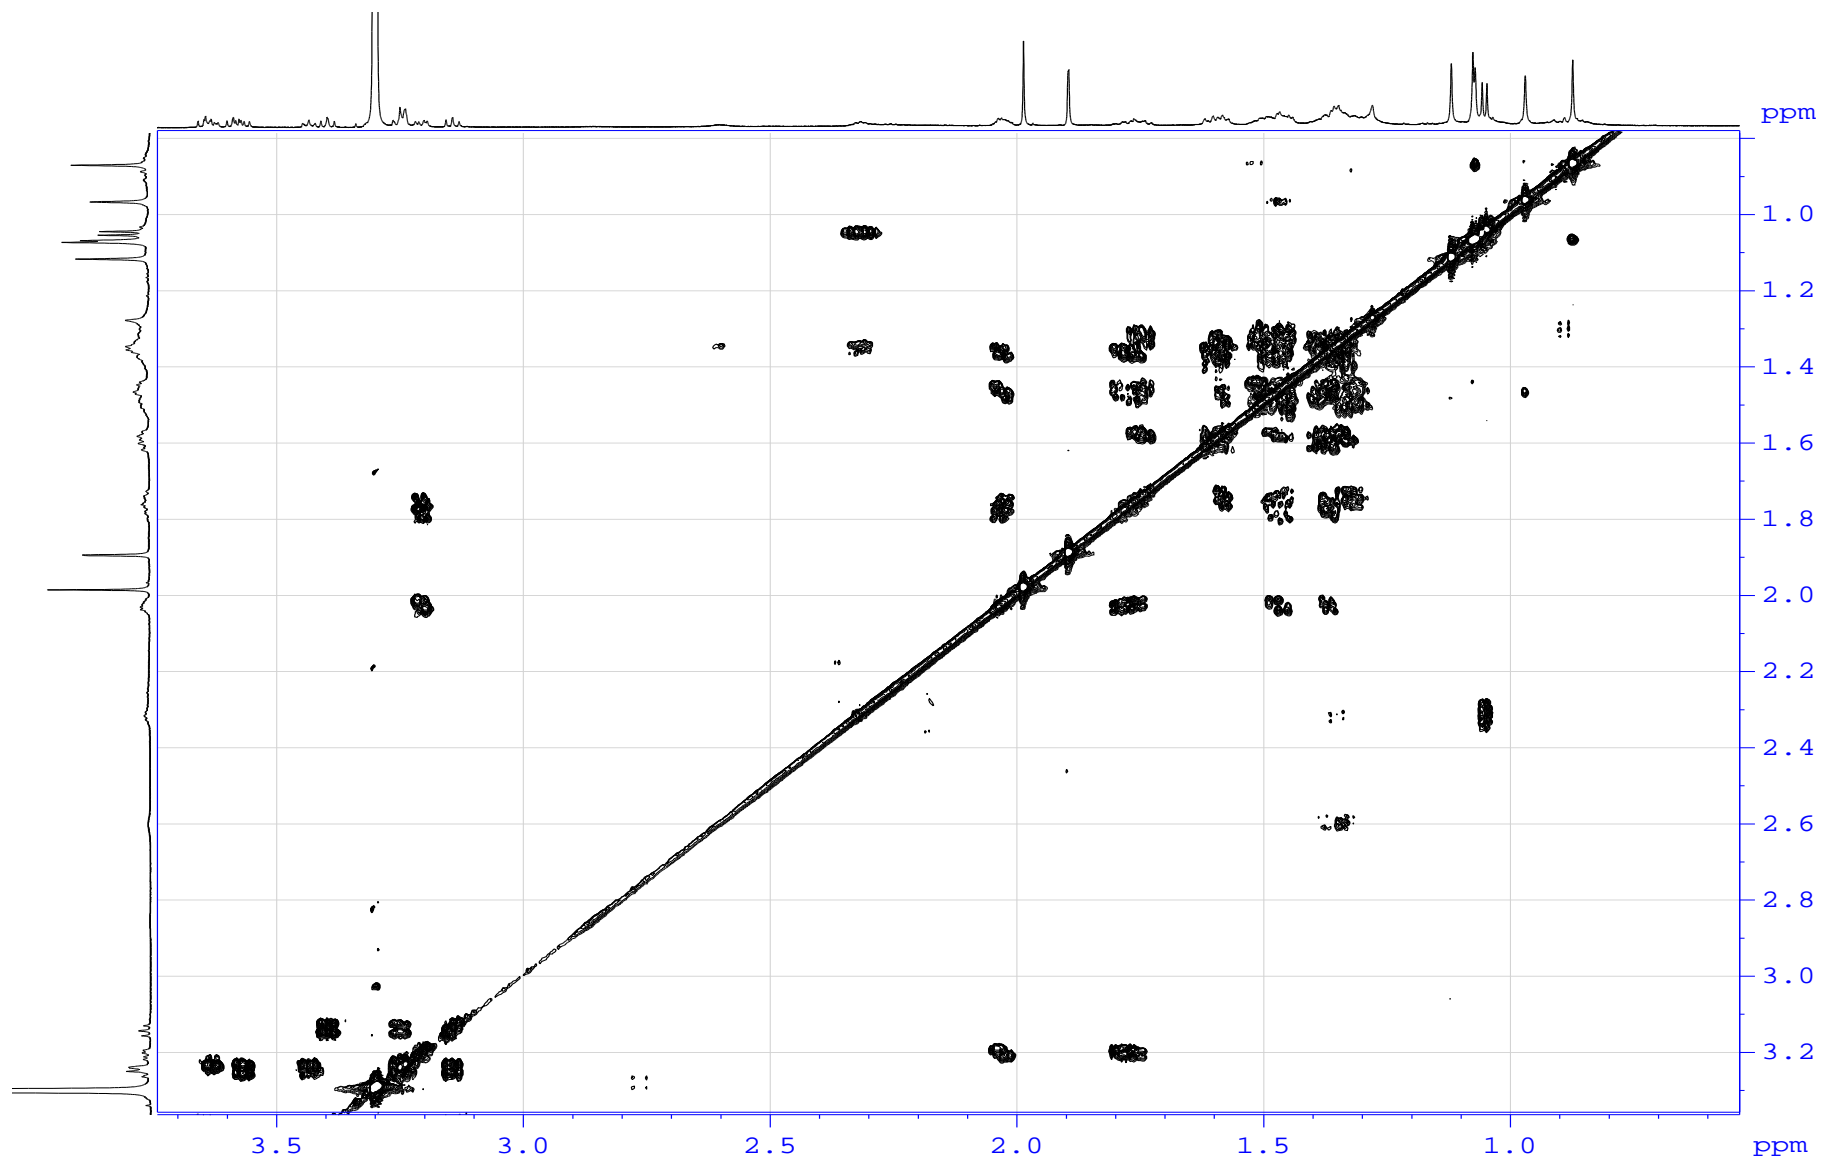

**S9** 2D TOCSY Spectrum of Rhabdastrelloside A (**1**) in CD<sub>3</sub>OD (700 MHz)

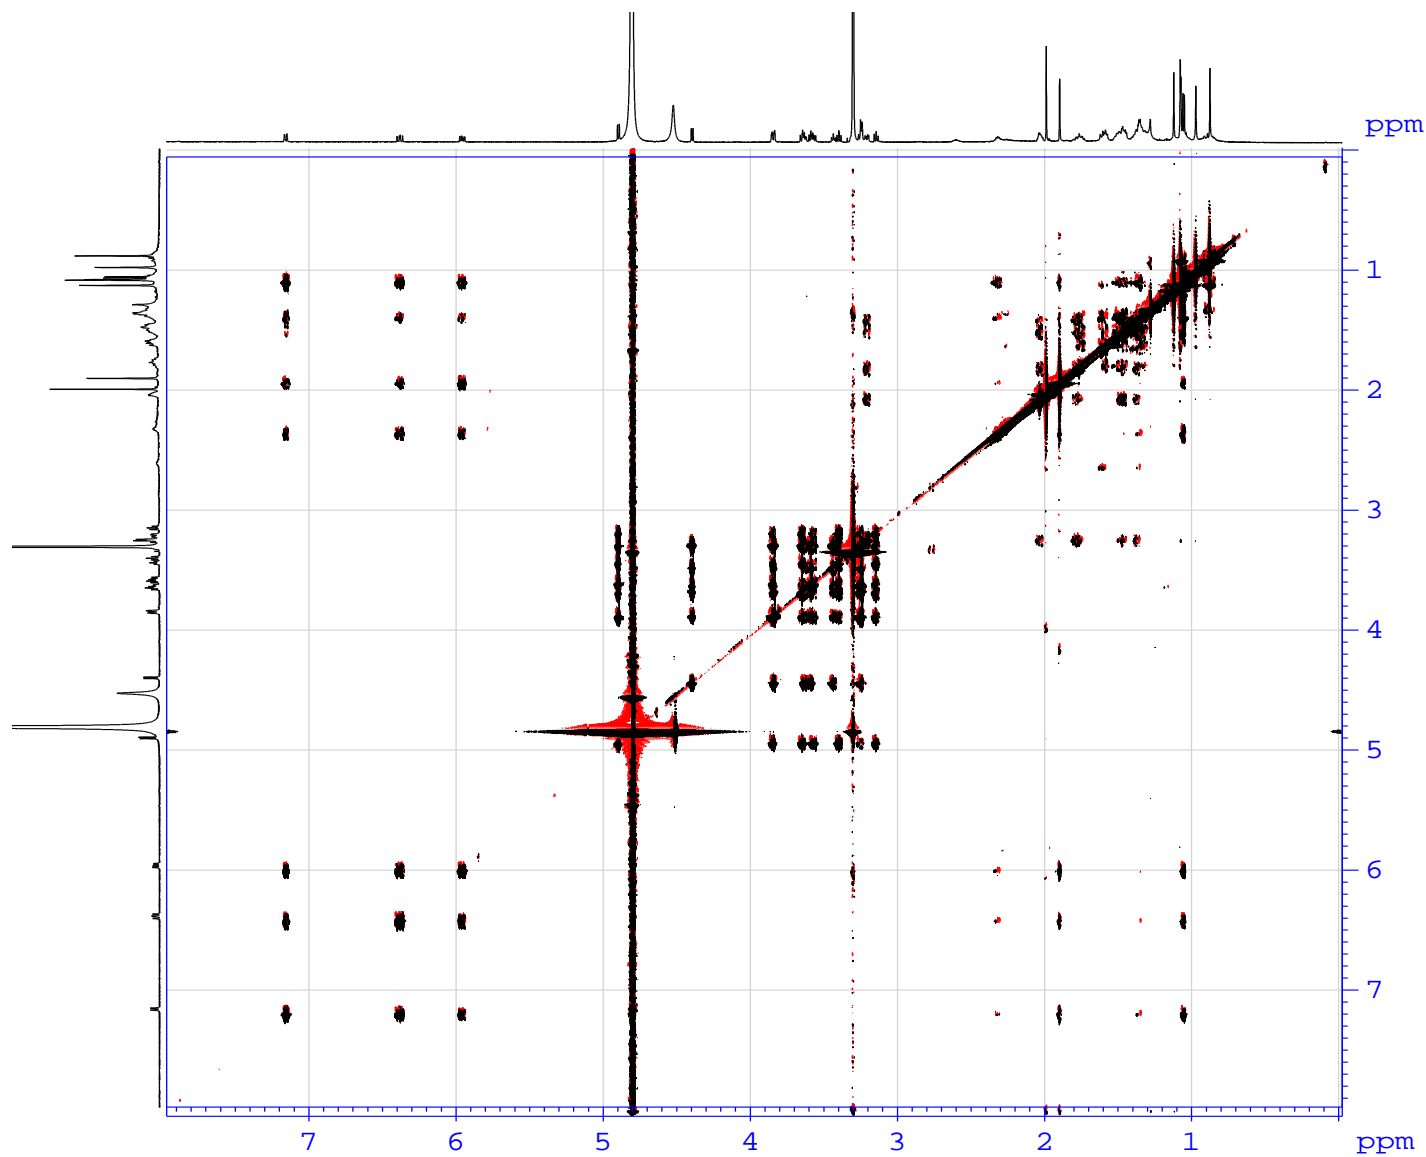

**S10** Expanded 2D TOCSY Spectrum for disaccharide moiety in Rhabdastrelloside A (**1**) in CD<sub>3</sub>OD (700 MHz)

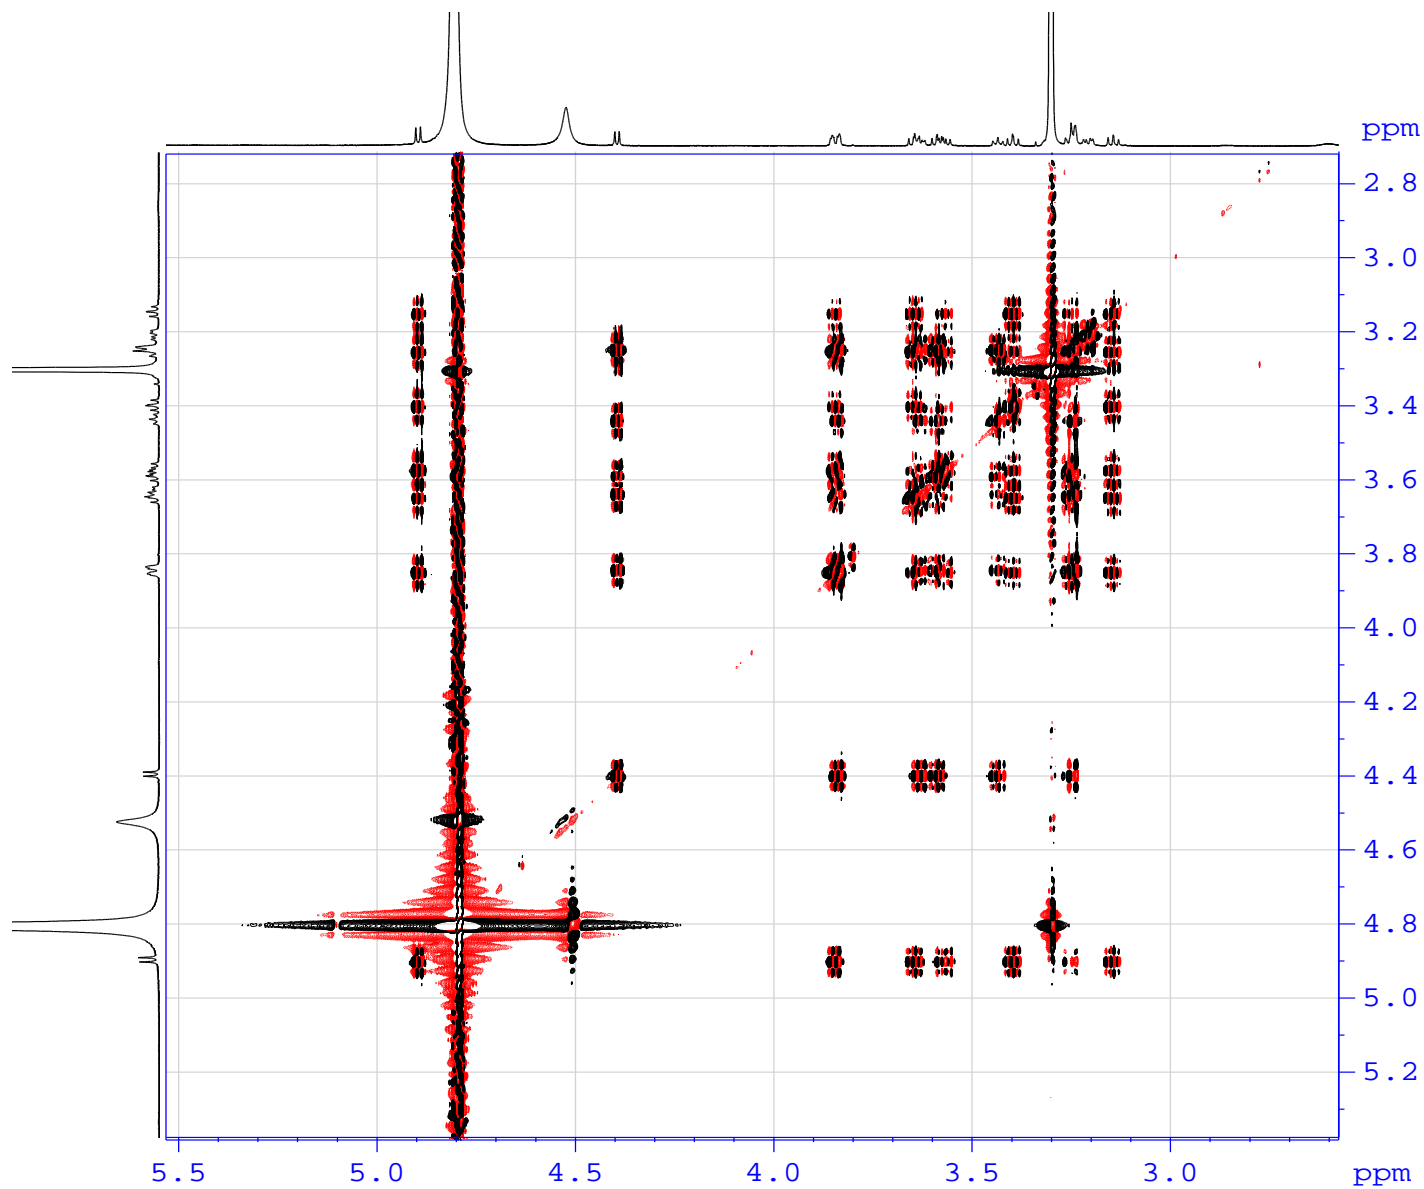

**S11** ROESY Spectrum of Rhabdastrelloside A (**1**) in CD<sub>3</sub>OD (700 MHz)

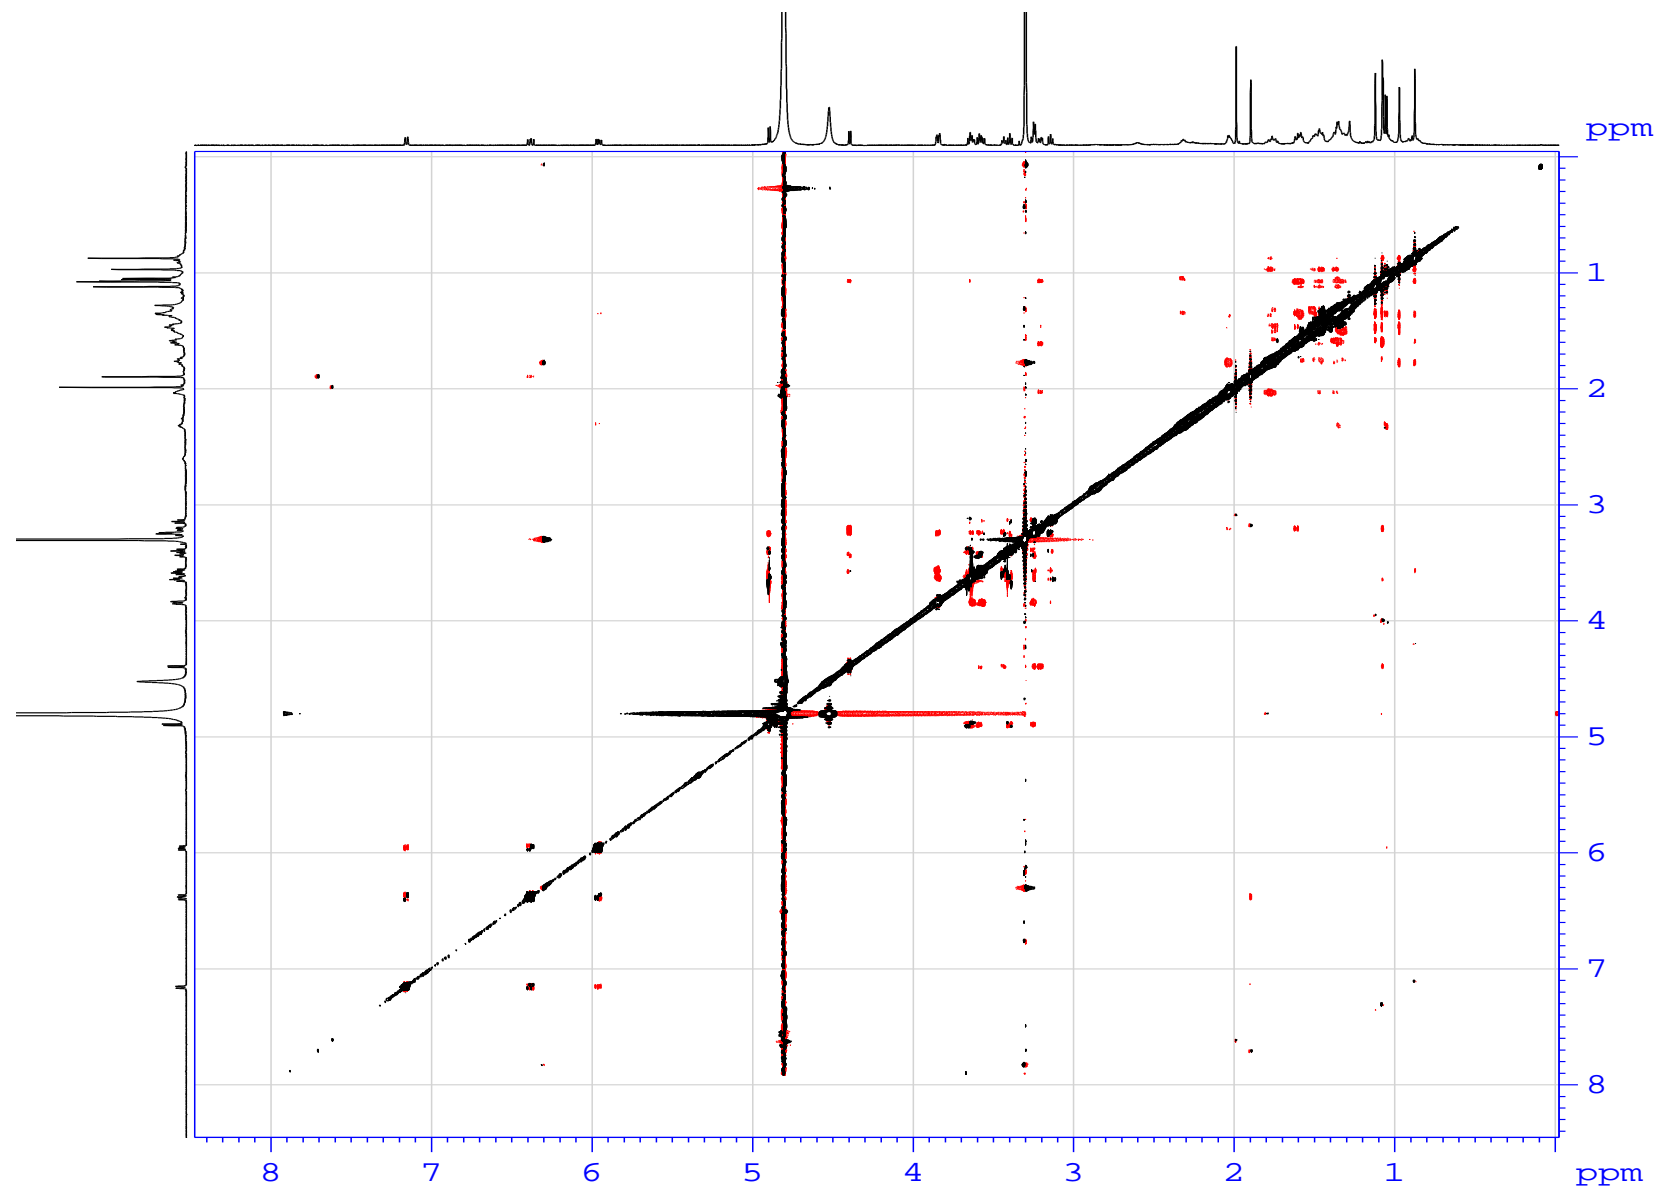

## S12 UV and ECD Spectra of Rhabdastrelloside A (1) in EtOH

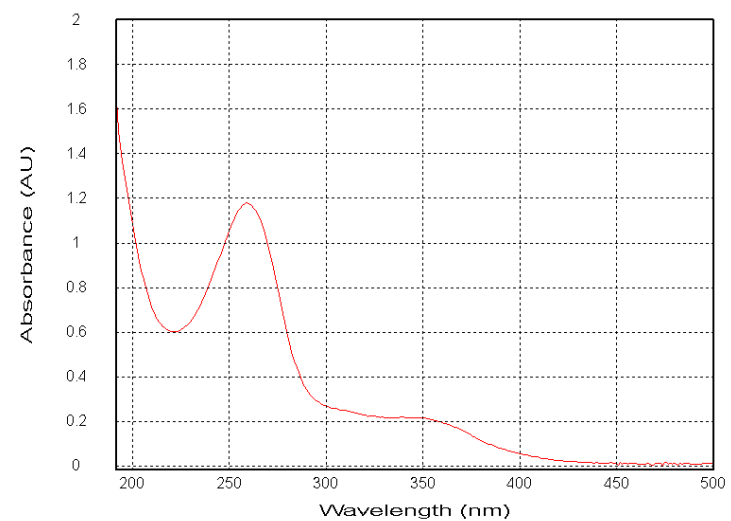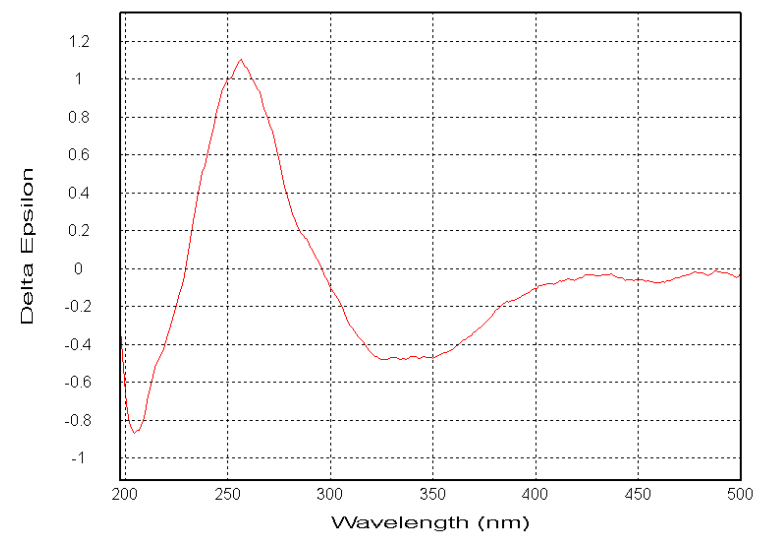

**S13** (–)HRESIMS of Rhabdastrelloside B (**2**) and MS/MS spectrum of its  $[M - H]^-$  precursor ion at  $m/z$  822

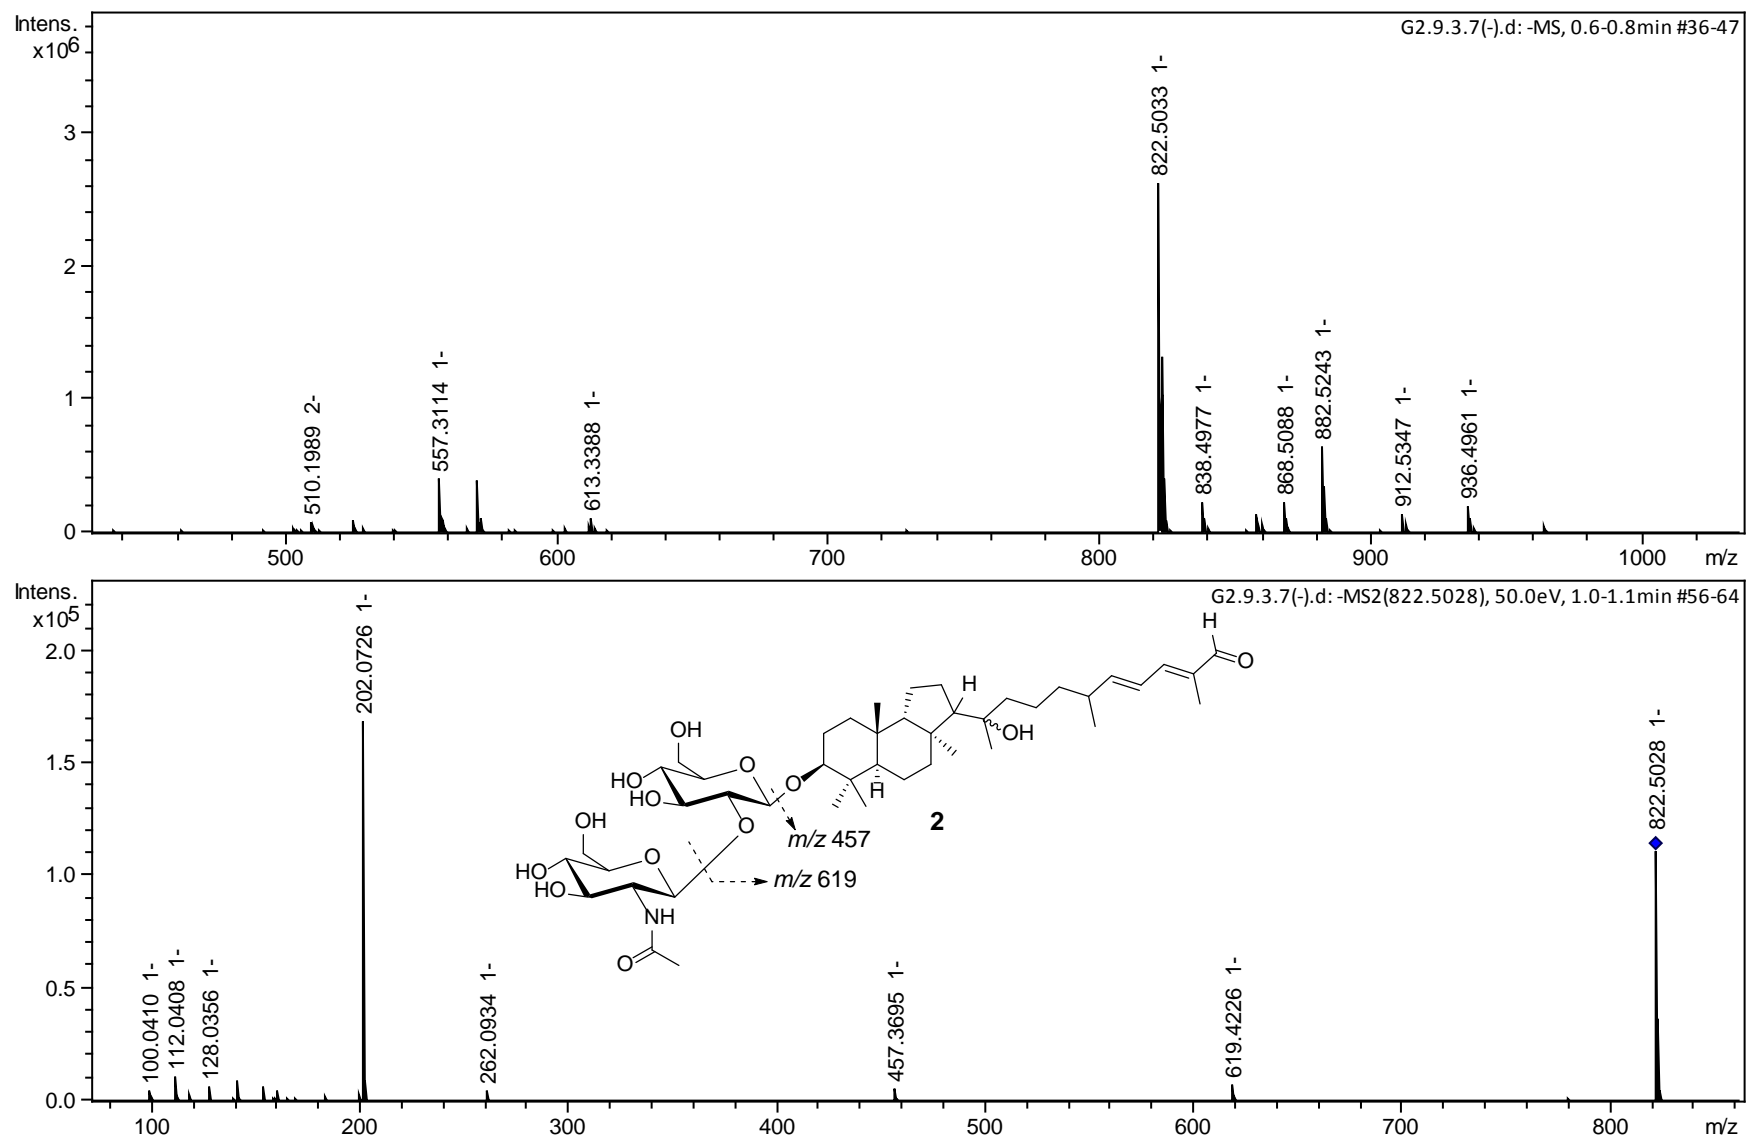

# S14 HRESIMS (Positive Ion Mode) of Rhabdastrelloside B (2)

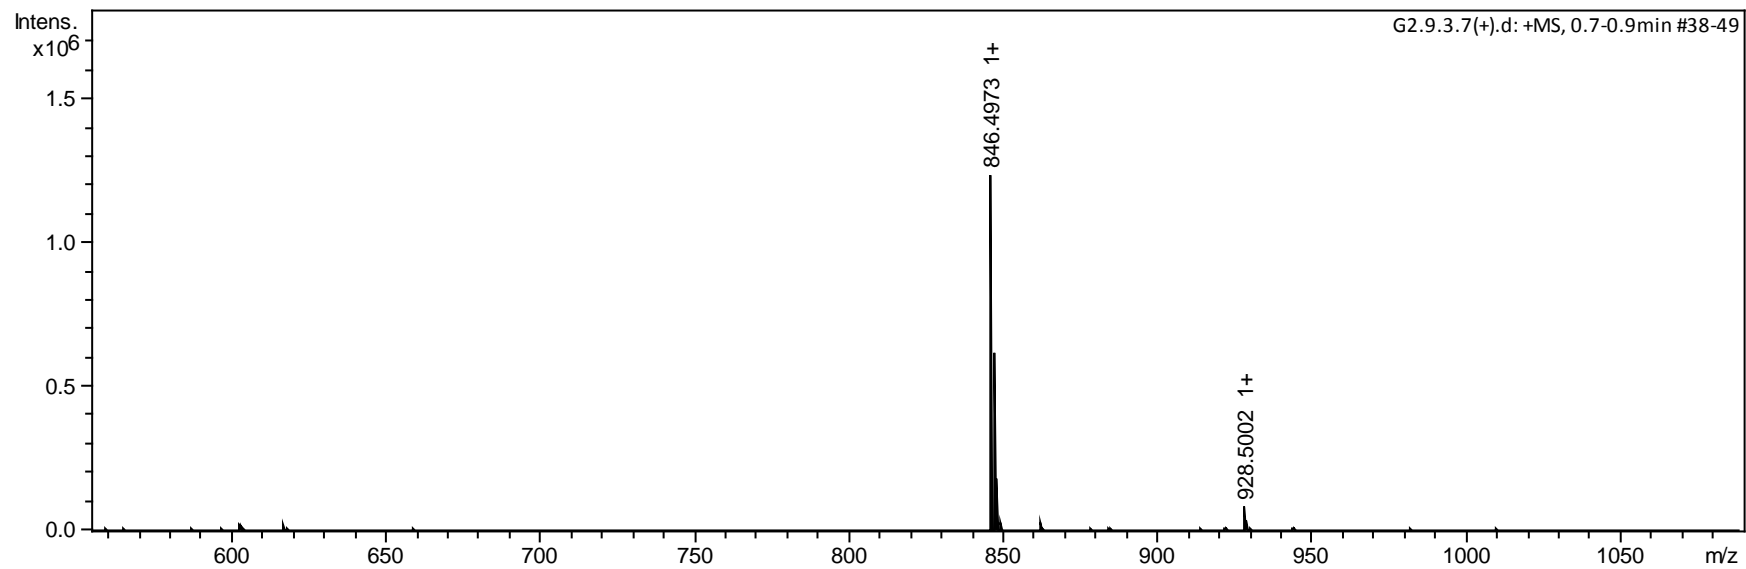



**S15**  $^1\text{H}$  NMR Spectrum of Rhabdastrelloside B (**2**) in  $\text{CD}_3\text{OD}$  (500 MHz)

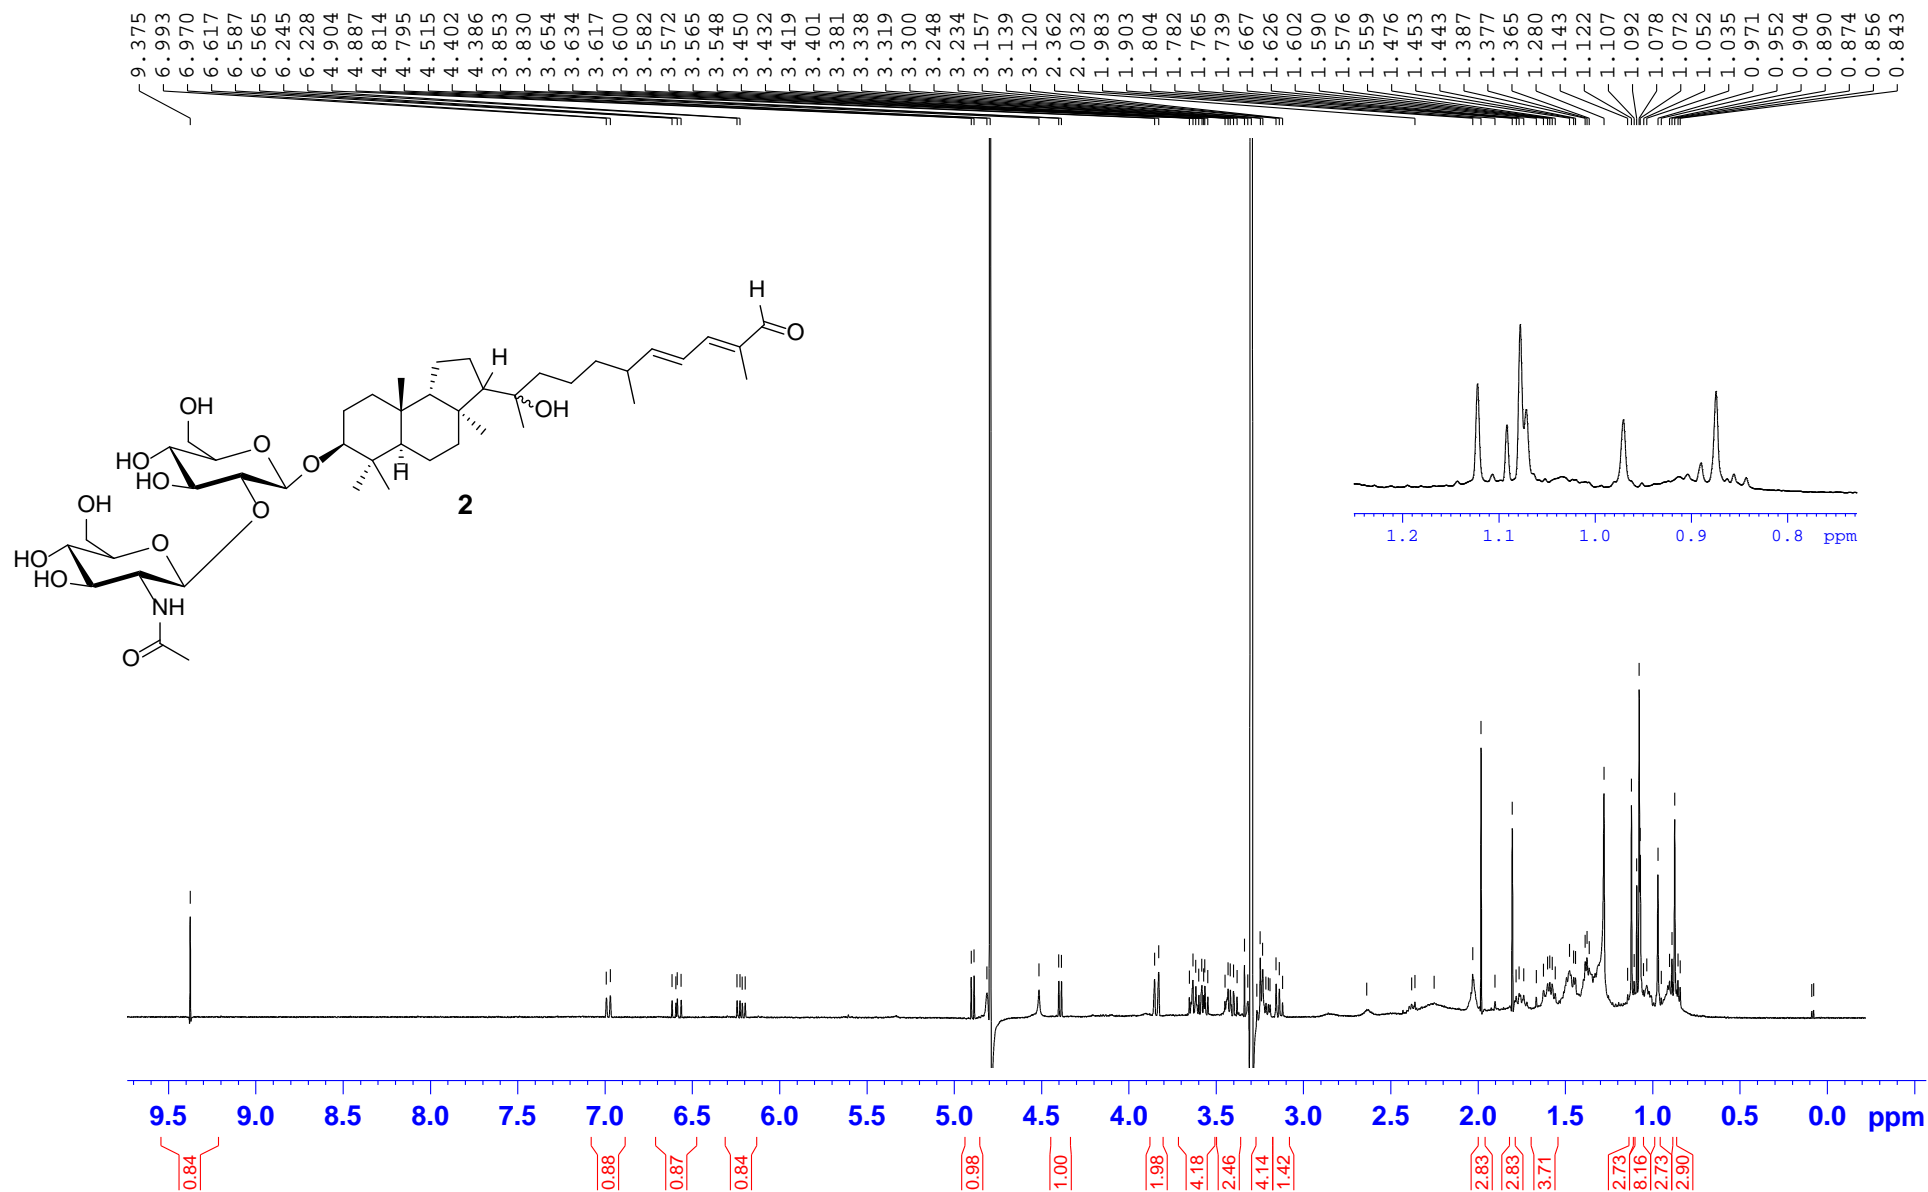

**S16**  $^{13}\text{C}$  NMR Spectrum of Rhabdastrelloside B (**2**) in  $\text{CD}_3\text{OD}$  (500 MHz)

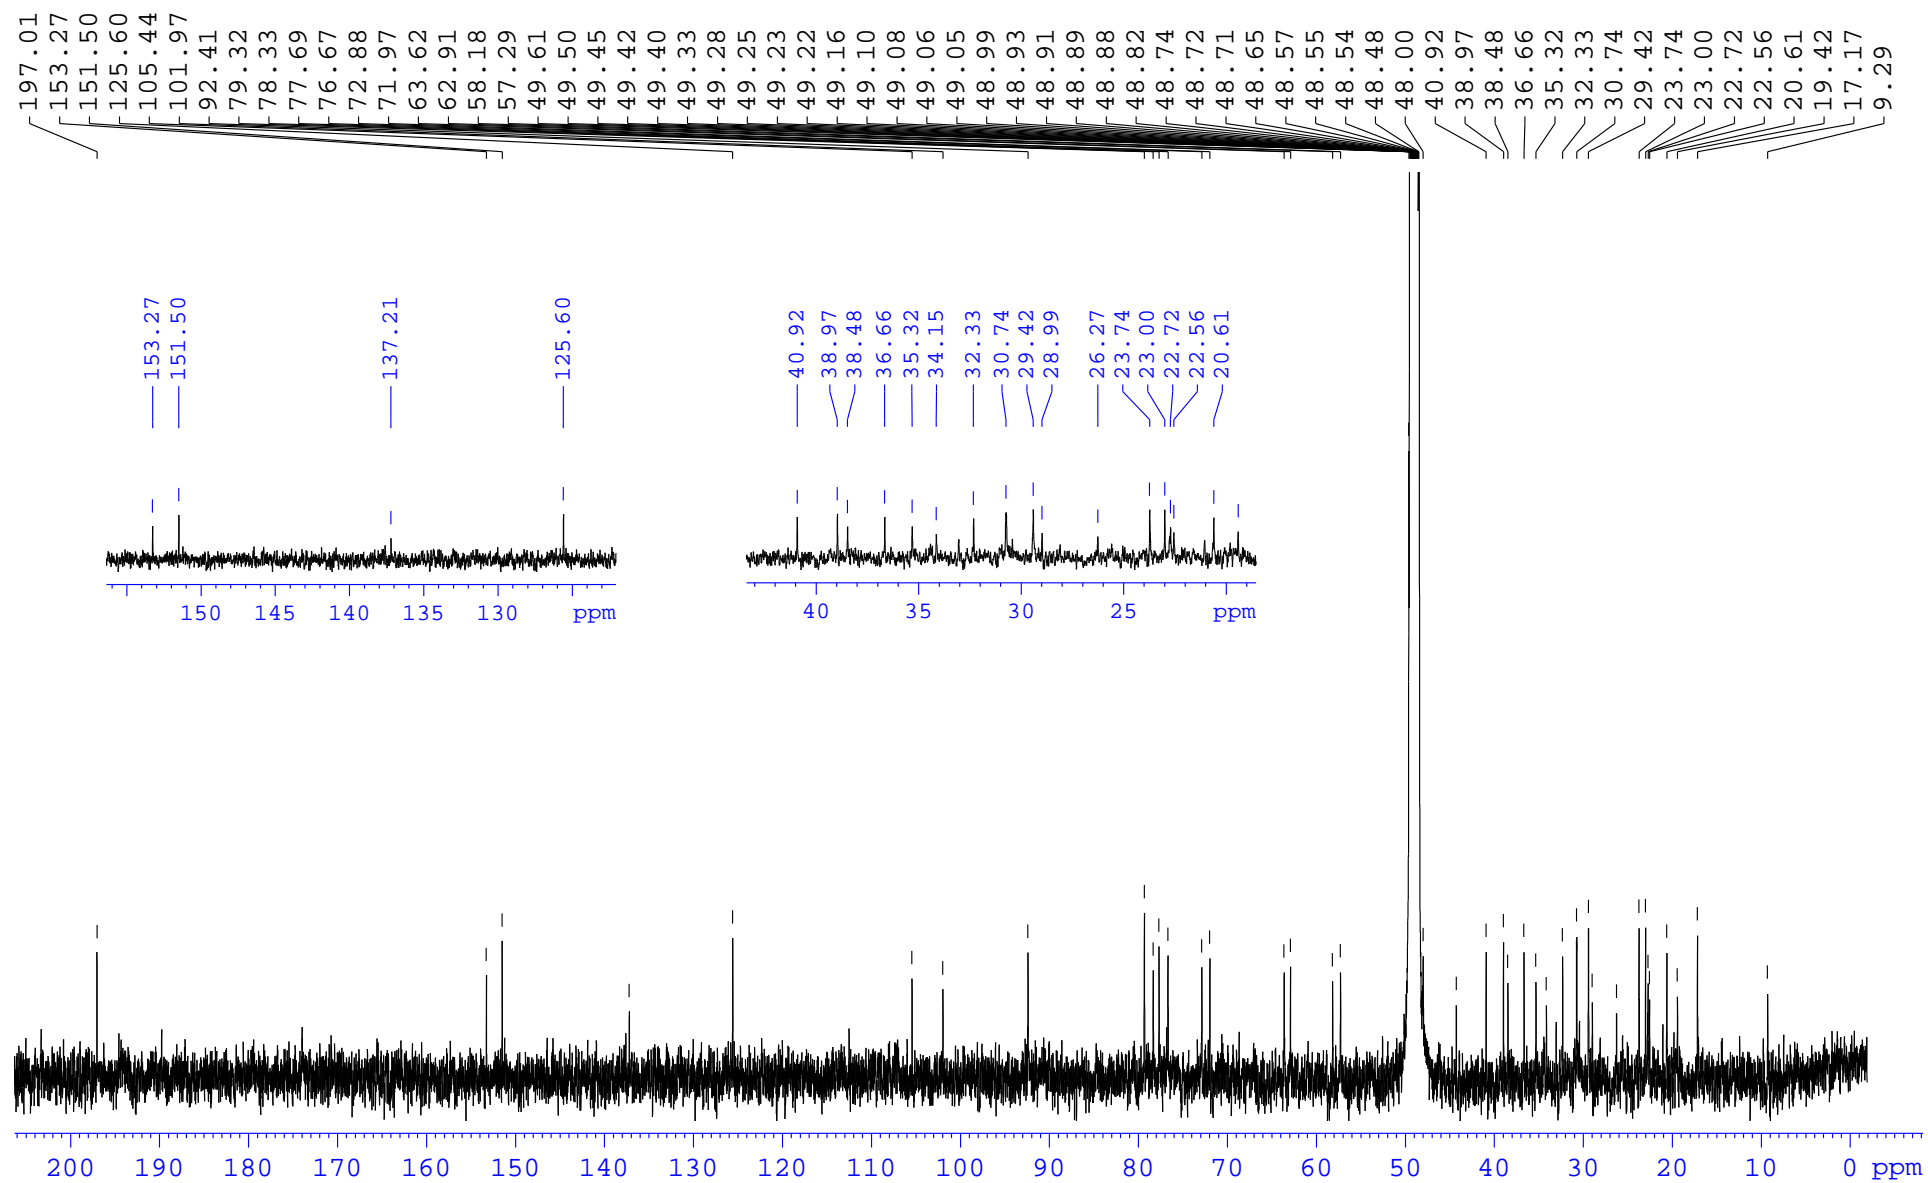

**S17** HSQC Spectrum of Rhabdastrelloside B (**2**) in CD<sub>3</sub>OD (500 MHz)

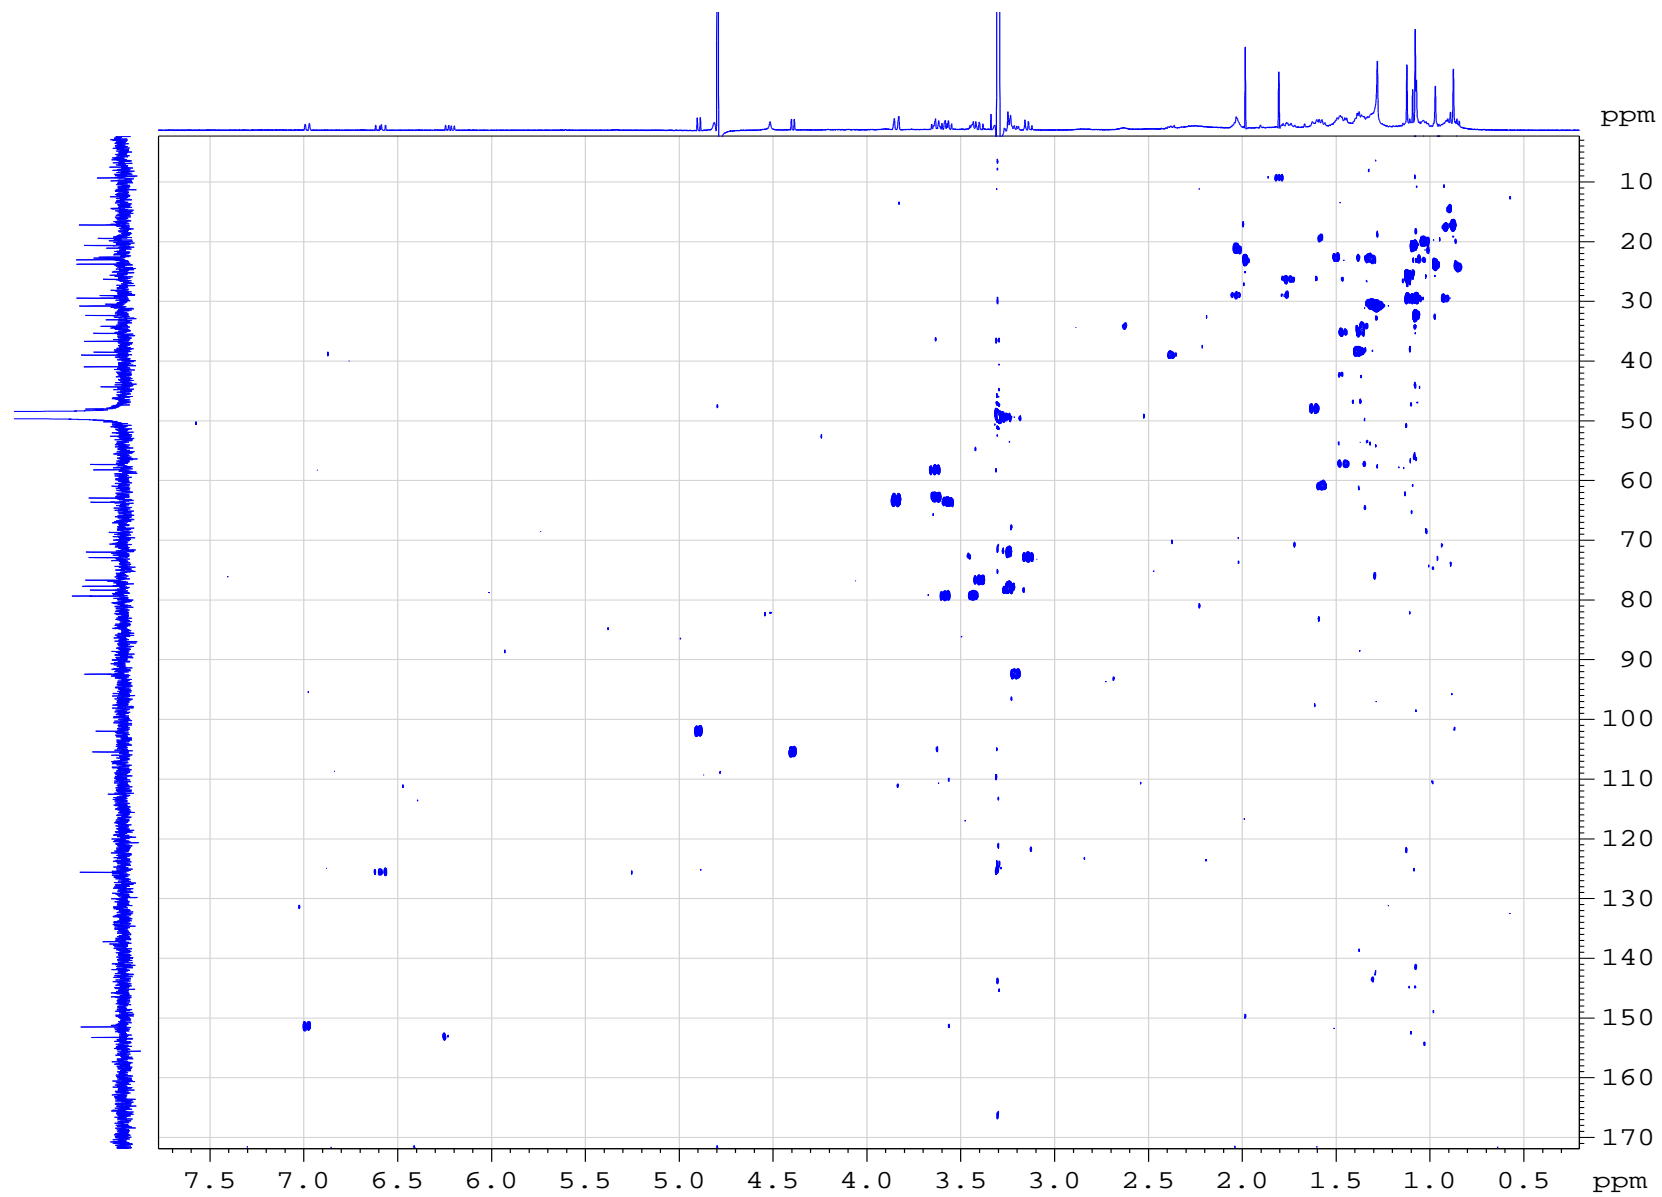

**S18** HMBC Spectrum of Rhabdastrelloside B (**2**) in CD<sub>3</sub>OD (700 MHz)

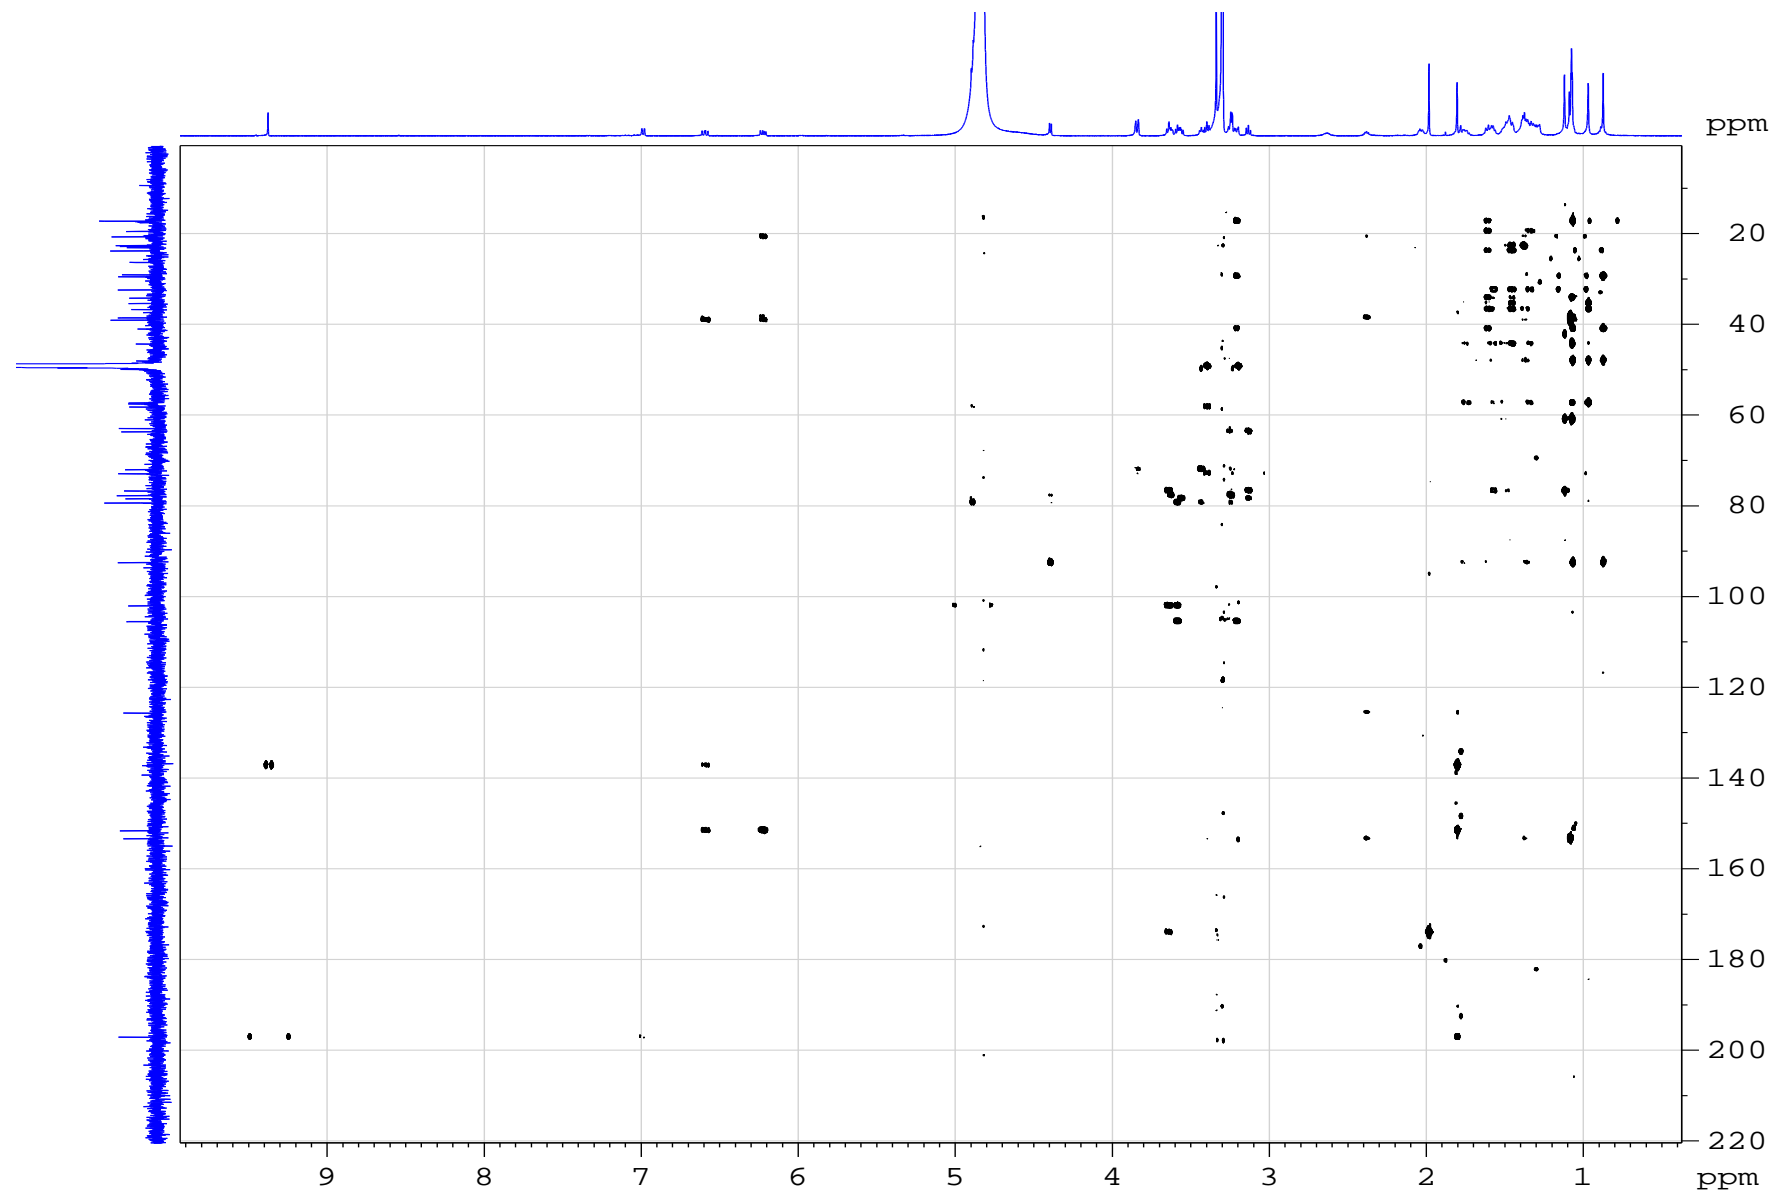

**S19** COSY Spectrum of Rhabdastrelloside B (**2**) in CD<sub>3</sub>OD (500 MHz)

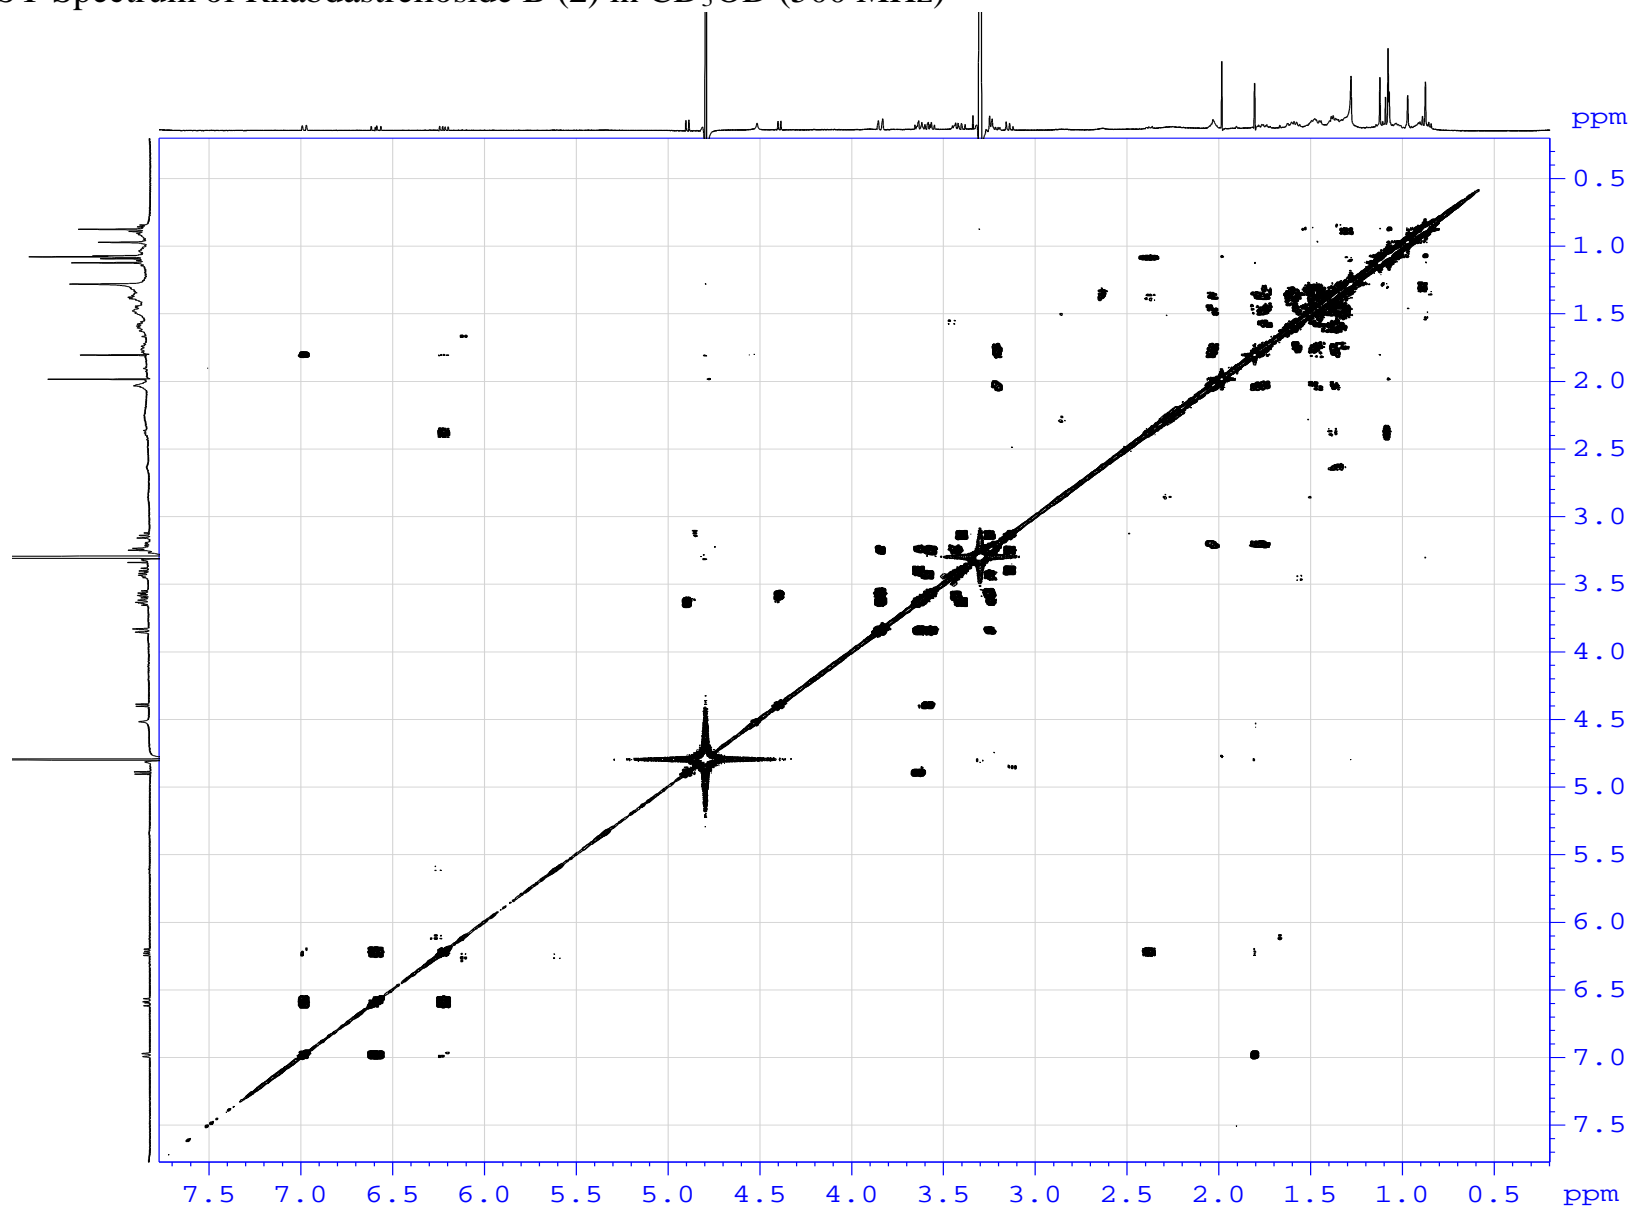

**S20** ROESY Spectrum of Rhabdastrelloside B (**2**) in CD<sub>3</sub>OD (500 MHz)

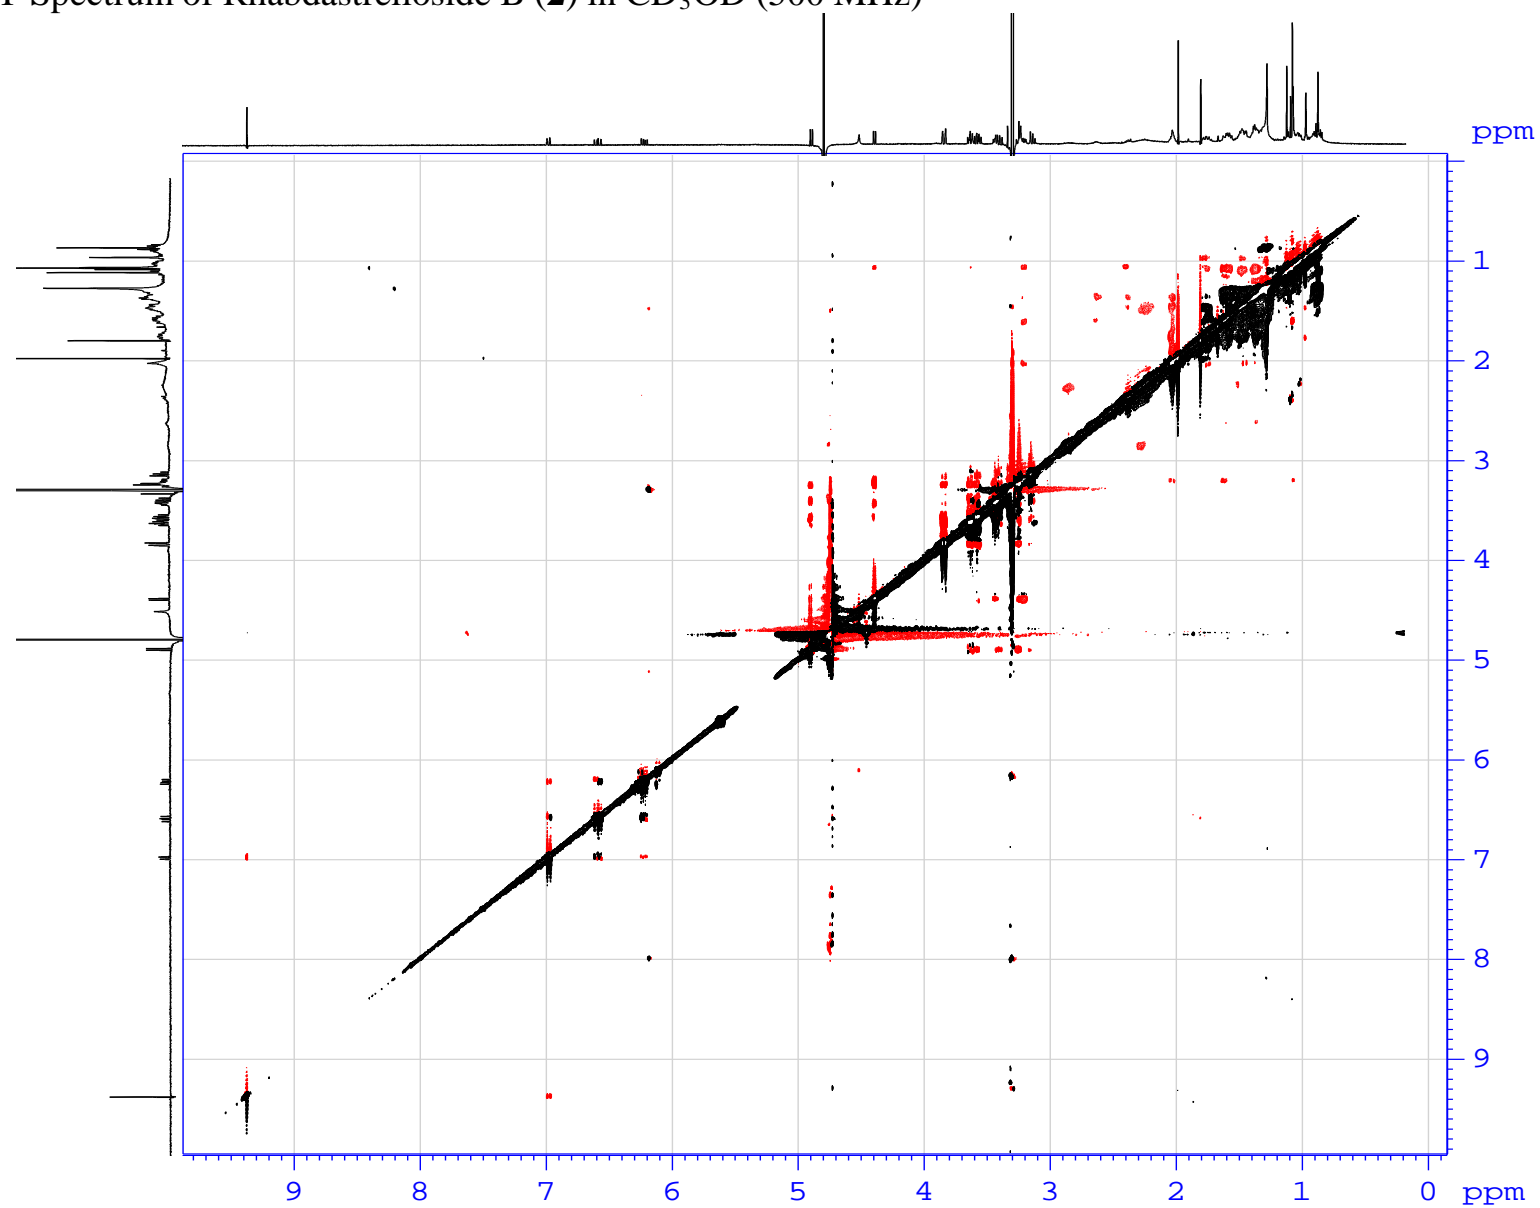

# **S21** 1D TOCSY Spectra of Rhabdastrelloside B (**2**) in CD<sub>3</sub>OD (500 MHz)

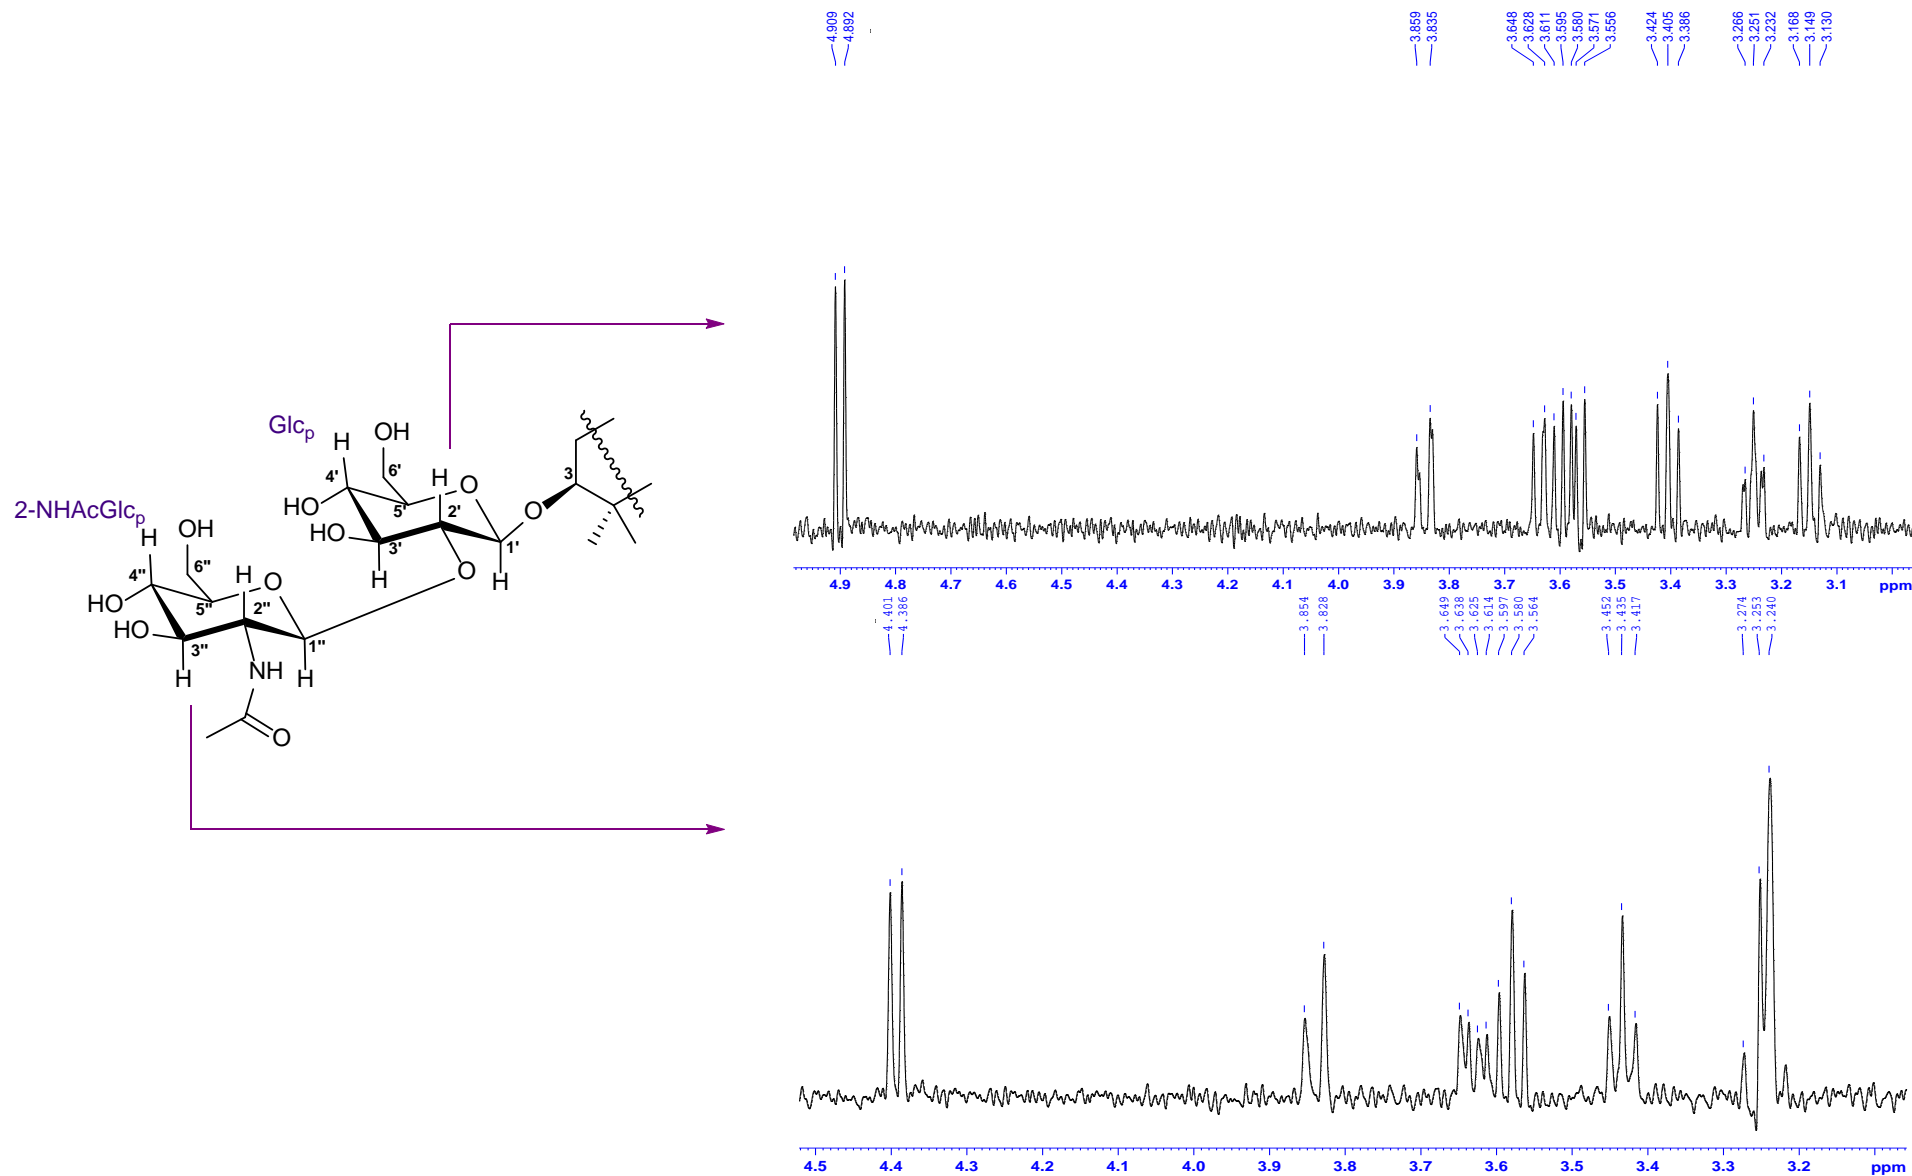

## S22 UV and ECD Spectra of Rhabdastrelloside B (2) in EtOH

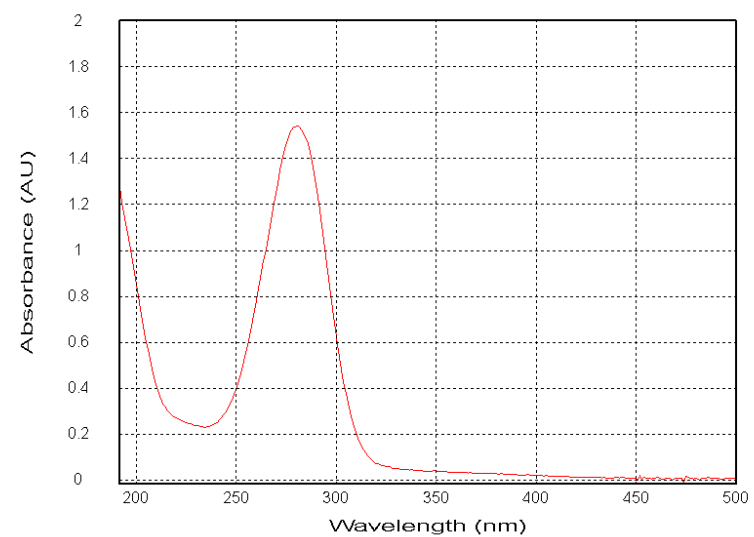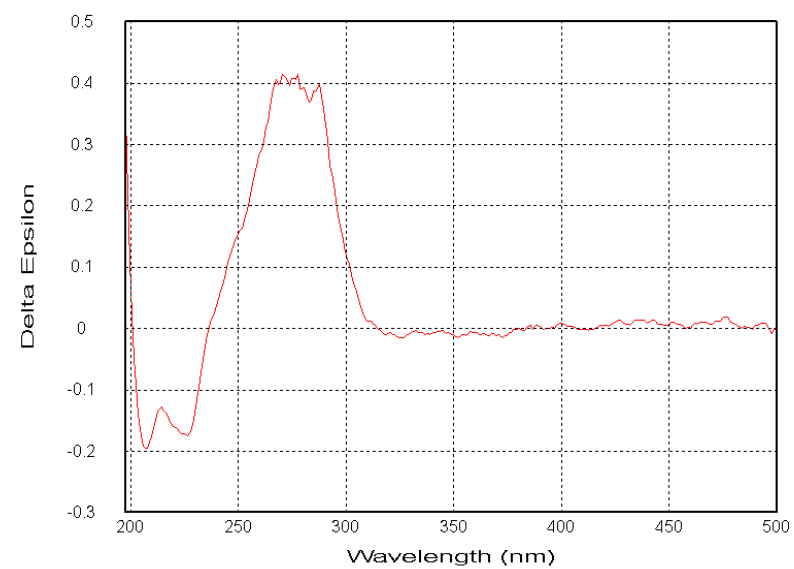



## S23 Determination of Absolute Configurations of Monosaccharides: GC-MS profiles.

Sample Name: G2.0.3.13  
Misc Info : 50 mkl 1 mkl  
Vial Number: 1

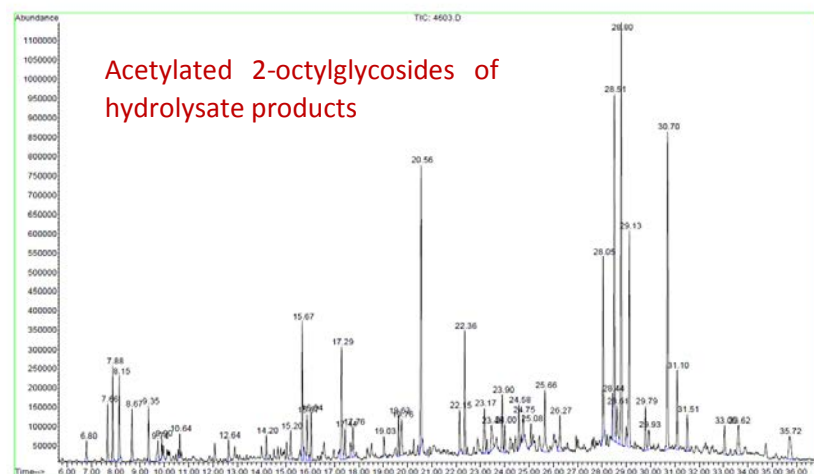

Sample Name: DGlucR(-)  
Misc Info : 100 mkl 0.6 mkl  
Vial Number: 1

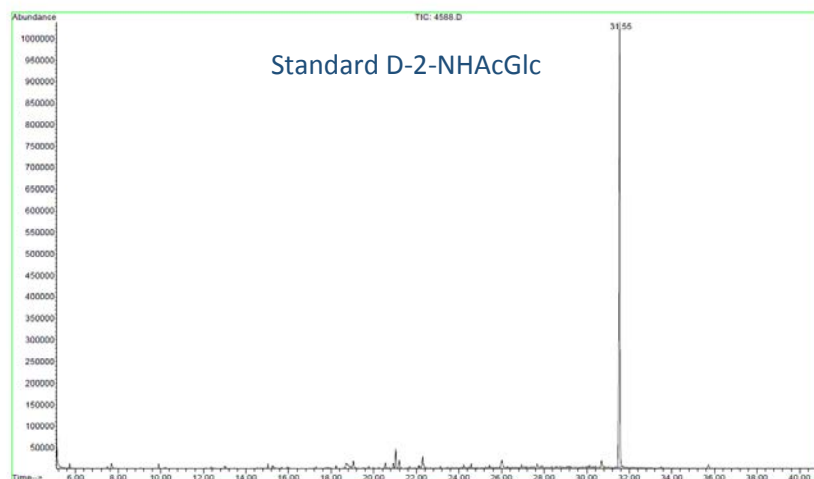

Acid hydrolysis of compound **2** (1.4 mg) was carried out as described in the text of the article (See part 4.5) The acetylated 2-octylglycosides were analyzed by GC-MS using the corresponding authentic samples prepared by the same procedure.

GC-MS analyses were carried out on a Hewlett Packard HP6890 GC System, with a HP-5MS capillary column (30 m x 0.25 mm, 0.25  $\mu$ m). The carrier gas was helium (flow rate 1.0 mL/min), the injector temperature was 270  $^{\circ}$ C, the ionizing voltage was 70 eV and the temperature program was 100  $^{\circ}$ C (0.5 min)  $-5^{\circ}$ C/min  $-250^{\circ}$ C (10 min).

Sample Name: DGluc(-)  
Misc Info : 0.2 mg 100 mkl 0.4 mkl  
Vial Number: 1

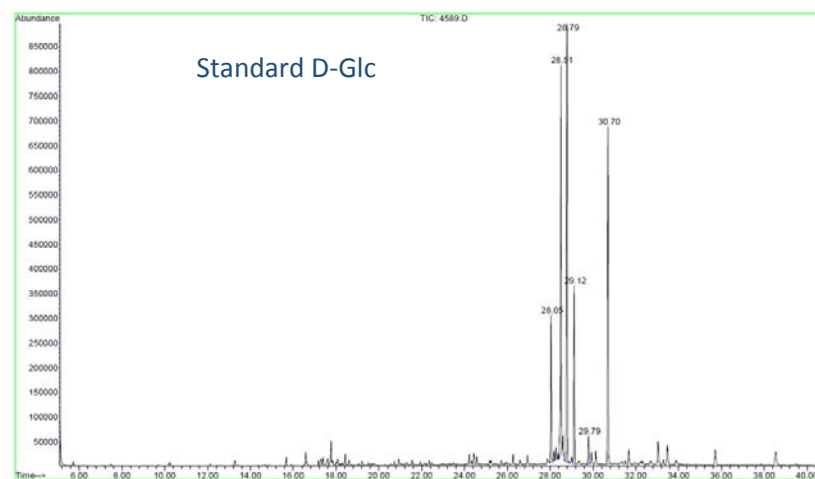

**S24** Determination of Absolute Configurations of Monosaccharides: GC-MS profiles for sum of Standard L-Glc and D-Glc, and Standard L-2-NHAcGlc.

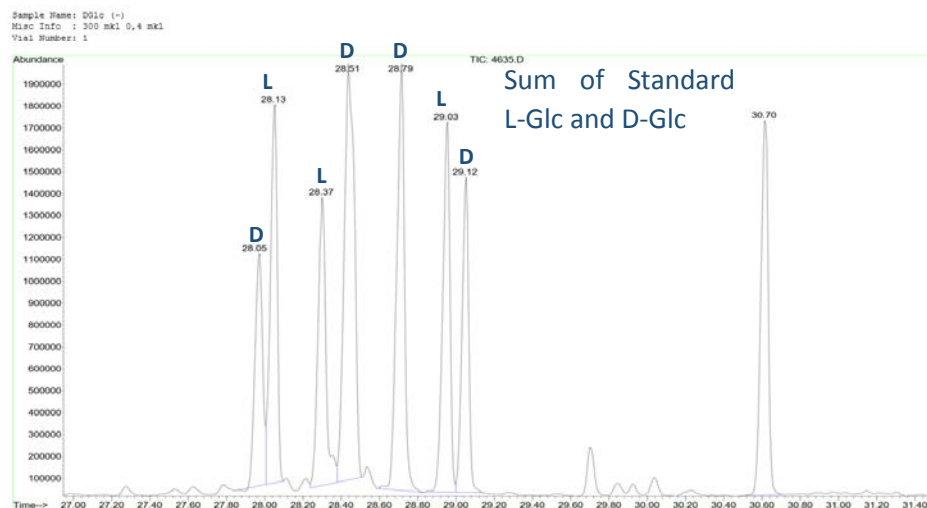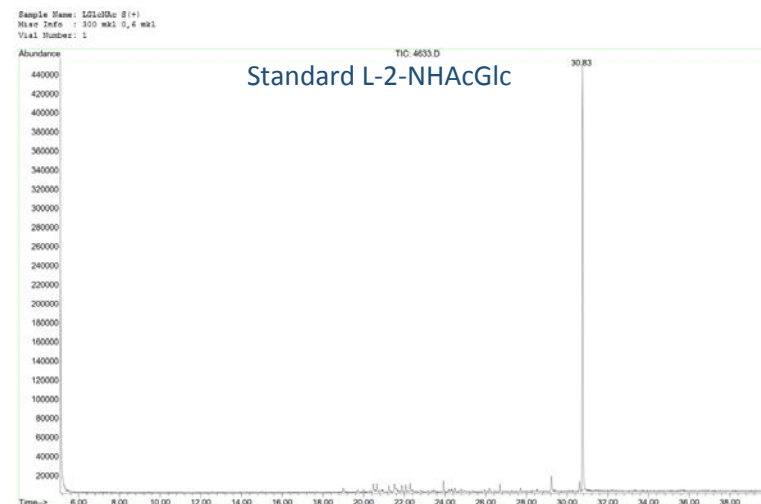

According to the retention times ( $t_R$ ) and corresponding mass-spectra, L-monosaccharides were not found among acetylated 2-octylglycosides of hydrolysate products.

## S25 Determination of Absolute Configurations of Monosaccharides: EIMS spectra of detected D-Glc and Standard D-Glc.

Sample Name: G2.8.3.13  
Misc Info : 50 mk1 1 mk1  
Vial Number: 1

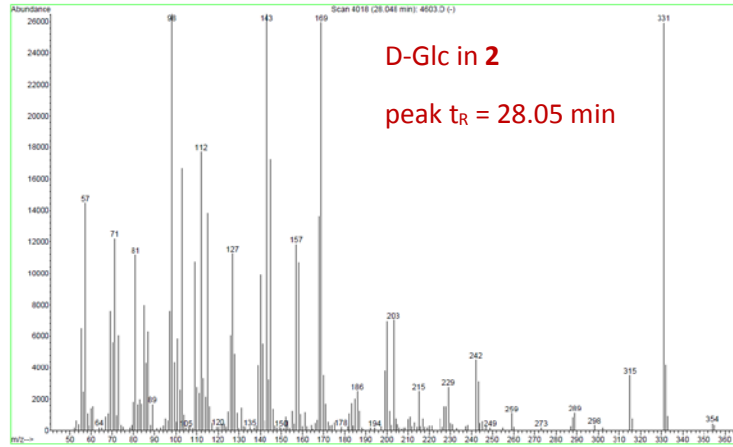

Sample Name: G2.8.3.13  
Misc Info : 50 mk1 1 mk1  
Vial Number: 1

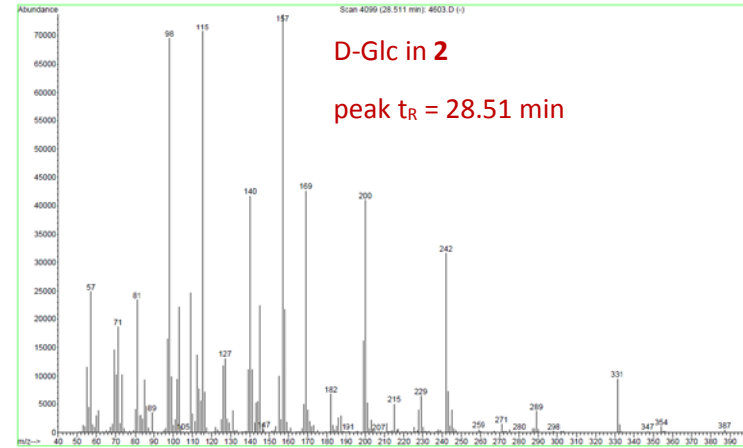

Sample Name: DGl(-)  
Misc Info : 0,2 mg 300 mk1 0,4 mk1  
Vial Number: 1

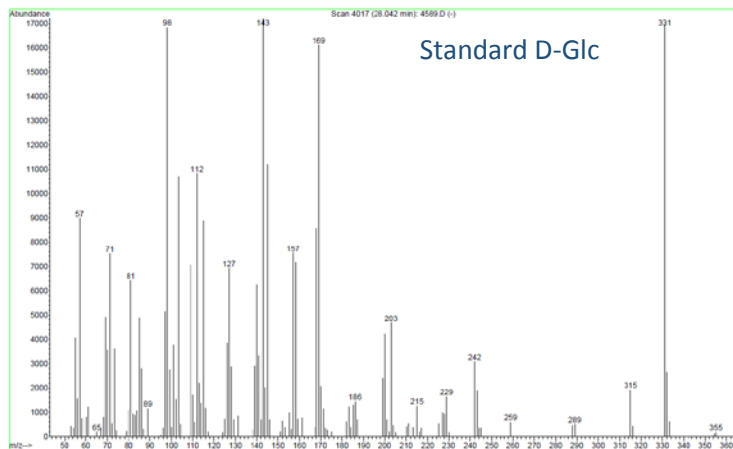

Sample Name: DGl(-)  
Misc Info : 0,2 mg 300 mk1 0,4 mk1  
Vial Number: 1

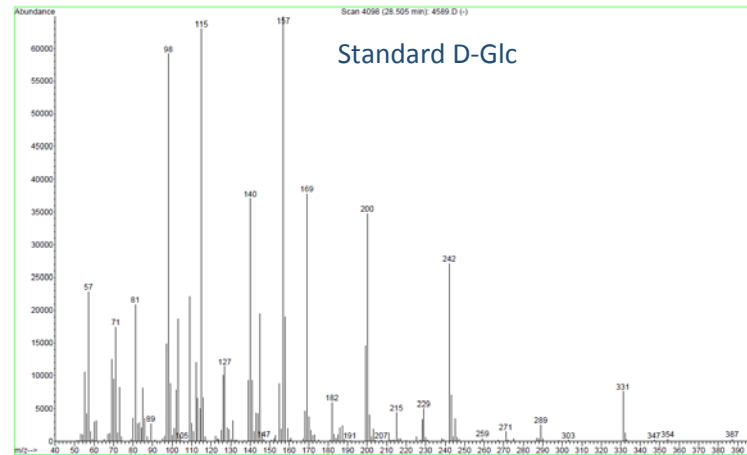

## S26 Determination of Absolute Configurations of Monosaccharides: EIMS spectra of detected D-Glc and Standard D-Glc (Continuation).

Sample Name: G2.8.3.13  
Misc Info : 50 mk1 1 mk1  
Vial Number: 1

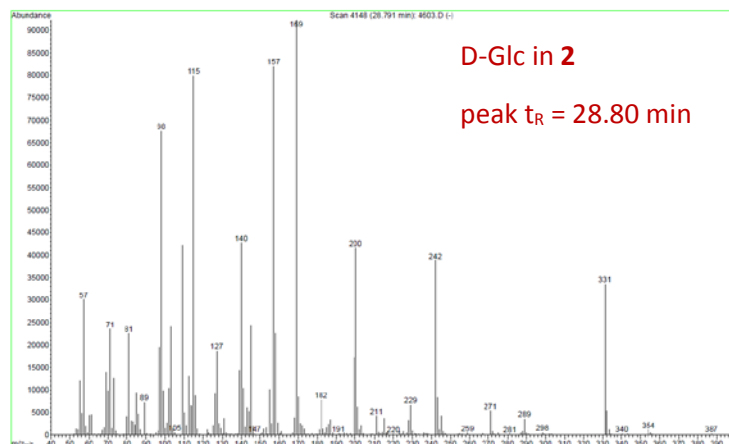

Sample Name: G2.8.3.13  
Misc Info : 50 mk1 1 mk1  
Vial Number: 1

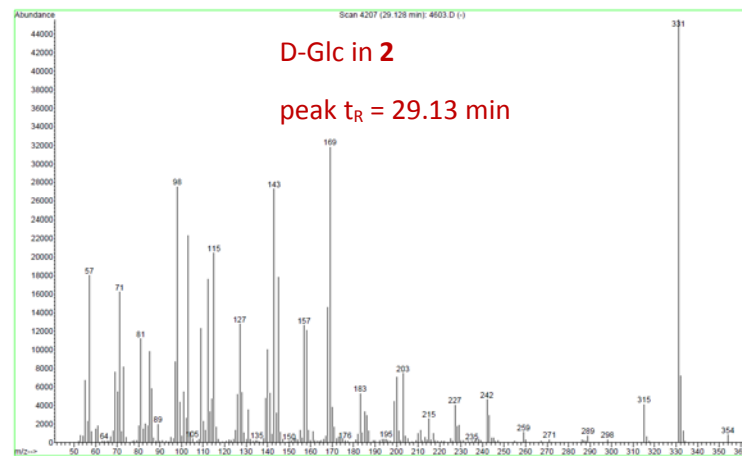

Sample Name: DGlC(-)  
Misc Info : 0.2 mg 300 mk1 0.4 mk1  
Vial Number: 1

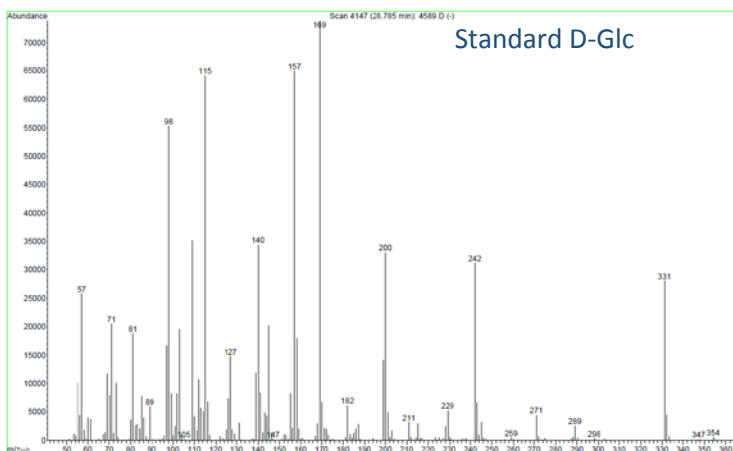

Sample Name: DGlC(-)  
Misc Info : 0.2 mg 300 mk1 0.4 mk1  
Vial Number: 1

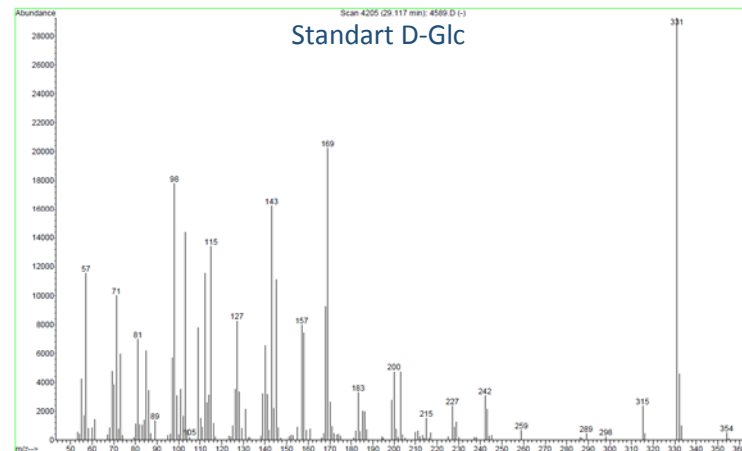

## S27 Determination of Absolute Configurations of Monosaccharides: EIMS spectra of detected D-2-NHAcGlc and Standard D-2-NHAcGlc.

Sample Name: G2.8.3.13  
Misc Info : 50 mk1 1 mk1  
Vial Number: 1

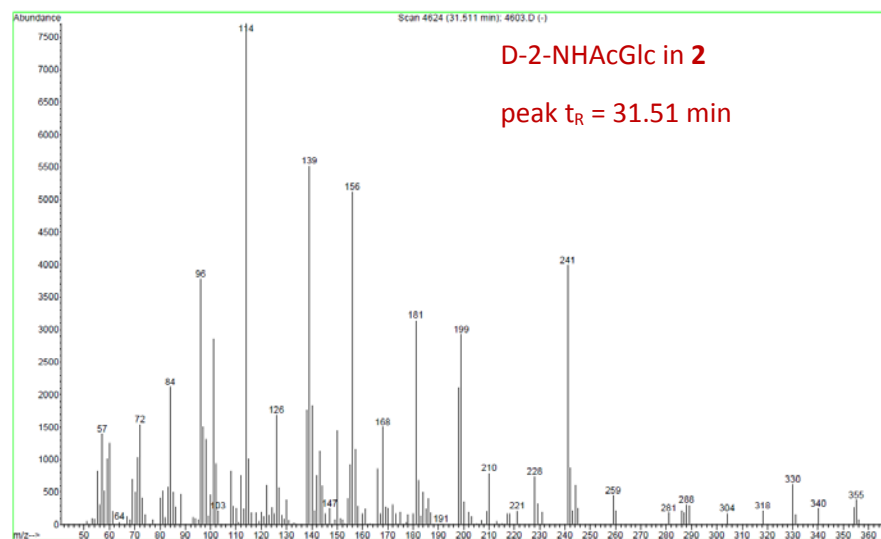

Sample Name: DGlcnAc R(-)  
Misc Info : 300 mk1 0,6 mk1  
Vial Number: 1

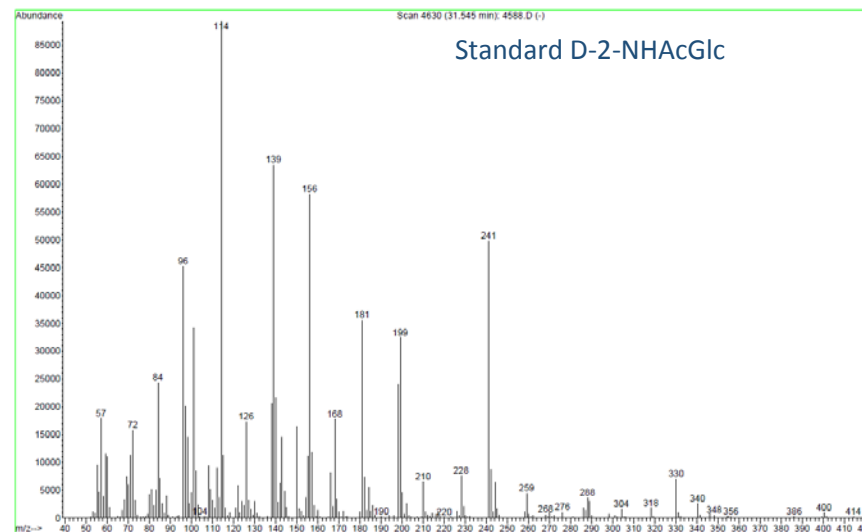

## S28 The Isolation Scheme

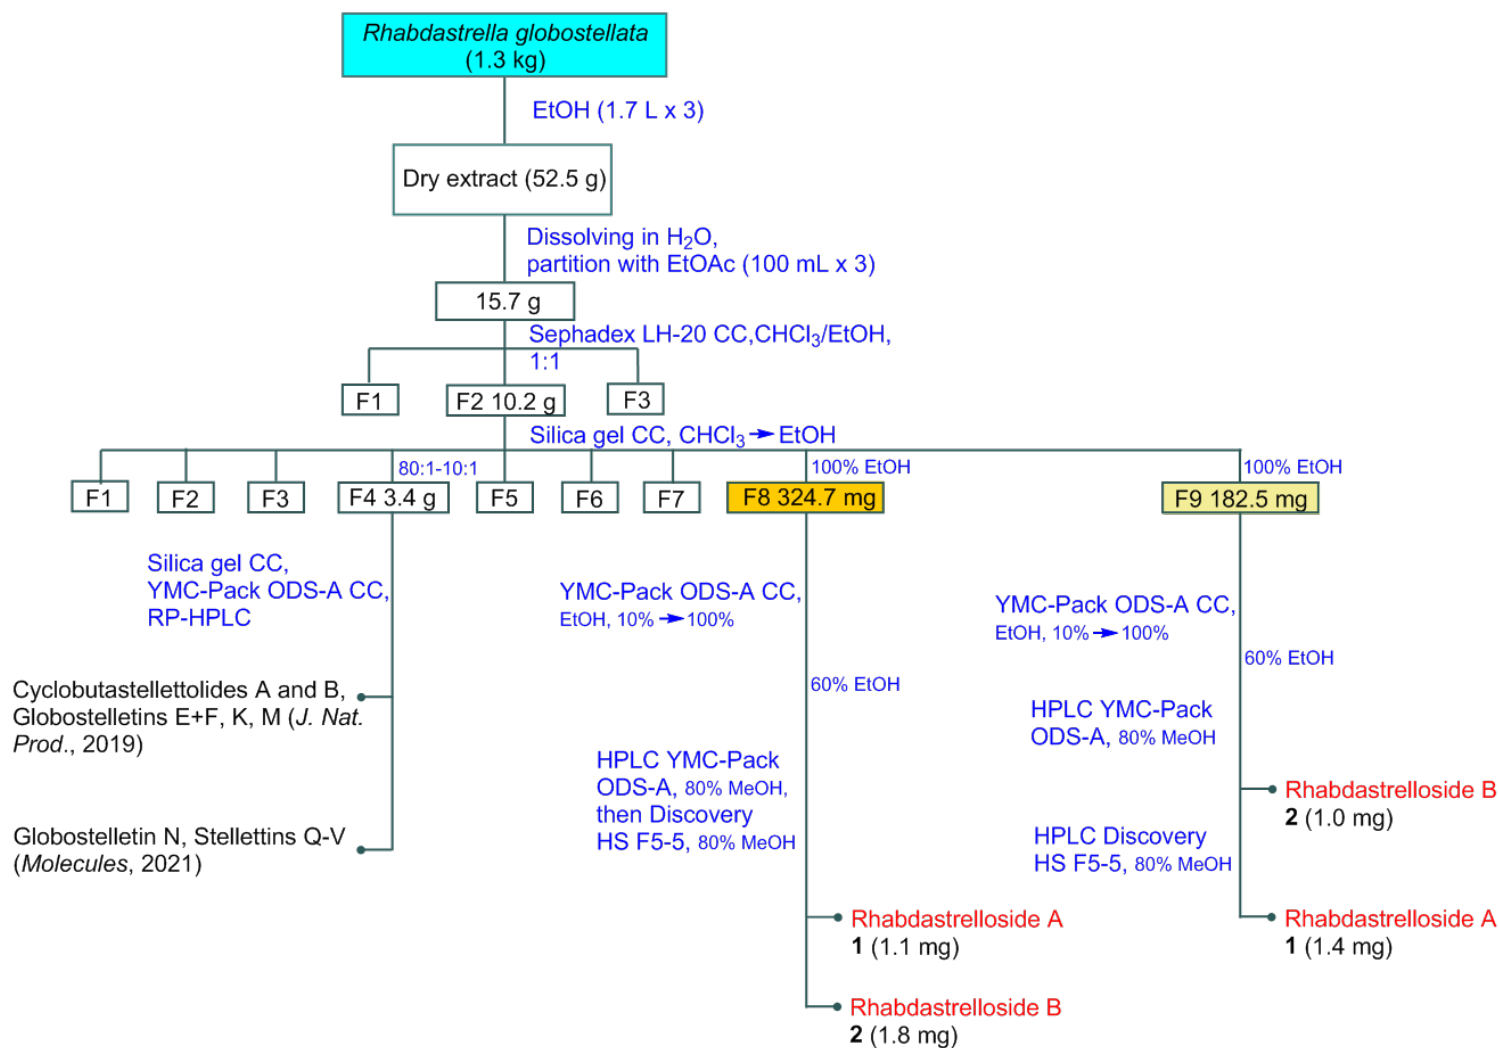

Cyclobutastellettolides A and B together with known globostelletins M, K, E, F were reported by us in **2019** (*J. Nat. Prod.*, <https://doi.org/10.1021/acs.jnatprod.9b00824>), and series of stellettins Q-V, along with known globostelletin N, was described in **2021** (*Molecules*, <https://doi.org/10.3390/molecules26030678>).
